# Supplementary material for: Conducting the RBD of SARS-CoV-2 Omicron Variant with Phytoconstituents from Euphorbia dendroides to Repudiate the Binding of Spike Glycoprotein Using Computational Molecular Search and Simulation Approach
Source: MDPI journal article supplement (doi:10.3390/molecules27092929), 2022-05-04
Supplement: s1 [file s1]

## **Supplementary material**

**Conducting the RBD of SARS-COV-2 Omicron Variant with Phytoconstituents from *Euphorbia dendroides* to Repudiate the Binding of Spike Glycoprotein Using Computational Molecular Search and Simulation Approach**

**Table S1. Compound name, 2D-chemical structure, and IUPAC name of the seventeen studied compounds.**

| Compound No. | 2D-Chemical Structure | Compound Name                                                    |
|--------------|-----------------------|------------------------------------------------------------------|
| 1            |                       | 24-methylene cycloartan-3 $\beta$ -ol                            |
| 2            |                       | Cycloart-23-ene-3 $\beta$ ,25-diol                               |
| 3            |                       | Cycloart-23-ene-3 $\beta$ ,25-diol monoacetate                   |
| 4            |                       | 3 $\beta$ -hydroxy-cycloart-23-ene-25 methyl ether               |
| 5            |                       | 24 <i>R/S</i> -3 $\beta$ -hydroxy-25-methylene cycloartan-24-ol  |
| 6            |                       | 23 <i>R/S</i> -3 $\beta$ -hydroxycycloart-24-ene-23-methyl ether |

|    |                                                                                     |                                                         |
|----|-------------------------------------------------------------------------------------|---------------------------------------------------------|
| 7  | 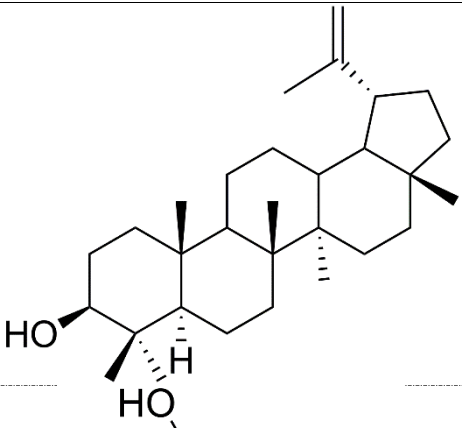   | Lupeol                                                  |
| 8  |    | Gallic acid                                             |
| 9  |   | Vanillin                                                |
| 10 |  | Protocatechuic acid                                     |
| 11 |  | <i>trans</i> -caffeic acid                              |
| 12 |  | Luteolin                                                |
| 13 |  | Kaempferol-3- <i>O</i> - $\beta$ -D-glucuronopyranoside |

|    |  |                                                                |
|----|--|----------------------------------------------------------------|
| 14 |  | Quercetin-3- <i>O</i> - $\beta$ -D-glucuronopyranoside         |
| 15 |  | Quercetin-3- <i>O</i> -glucuronide 6''- <i>O</i> -methyl ester |
| 16 |  | Kampferol-3- <i>O</i> -glucuronide 6''- <i>O</i> -methyl ester |
| 17 |  | Quercetin-3- <i>O</i> - $\beta$ -D-glucopyranoside             |

**Table S2.** Calculated docking scores (in kcal/mol) for the SARS-COV-2 Omicron drug candidates.

| Compound No. | Docking Score (kcal/mol) |
|--------------|--------------------------|
| 1            | -4.4                     |
| 2            | -5.7                     |
| 3            | -6.4                     |
| 4            | -5.3                     |
| 5            | -4.7                     |
| 6            | -6.1                     |
| 7            | -5.0                     |
| 8            | -6.8                     |
| 9            | -7.2                     |
| 10           | -7.6                     |
| 11           | -7.7                     |
| 12           | -7.9                     |
| 13           | -8.1                     |
| 14           | -8.7                     |
| 15           | -8.8                     |
| 16           | -8.4                     |
| 17           | -8.3                     |

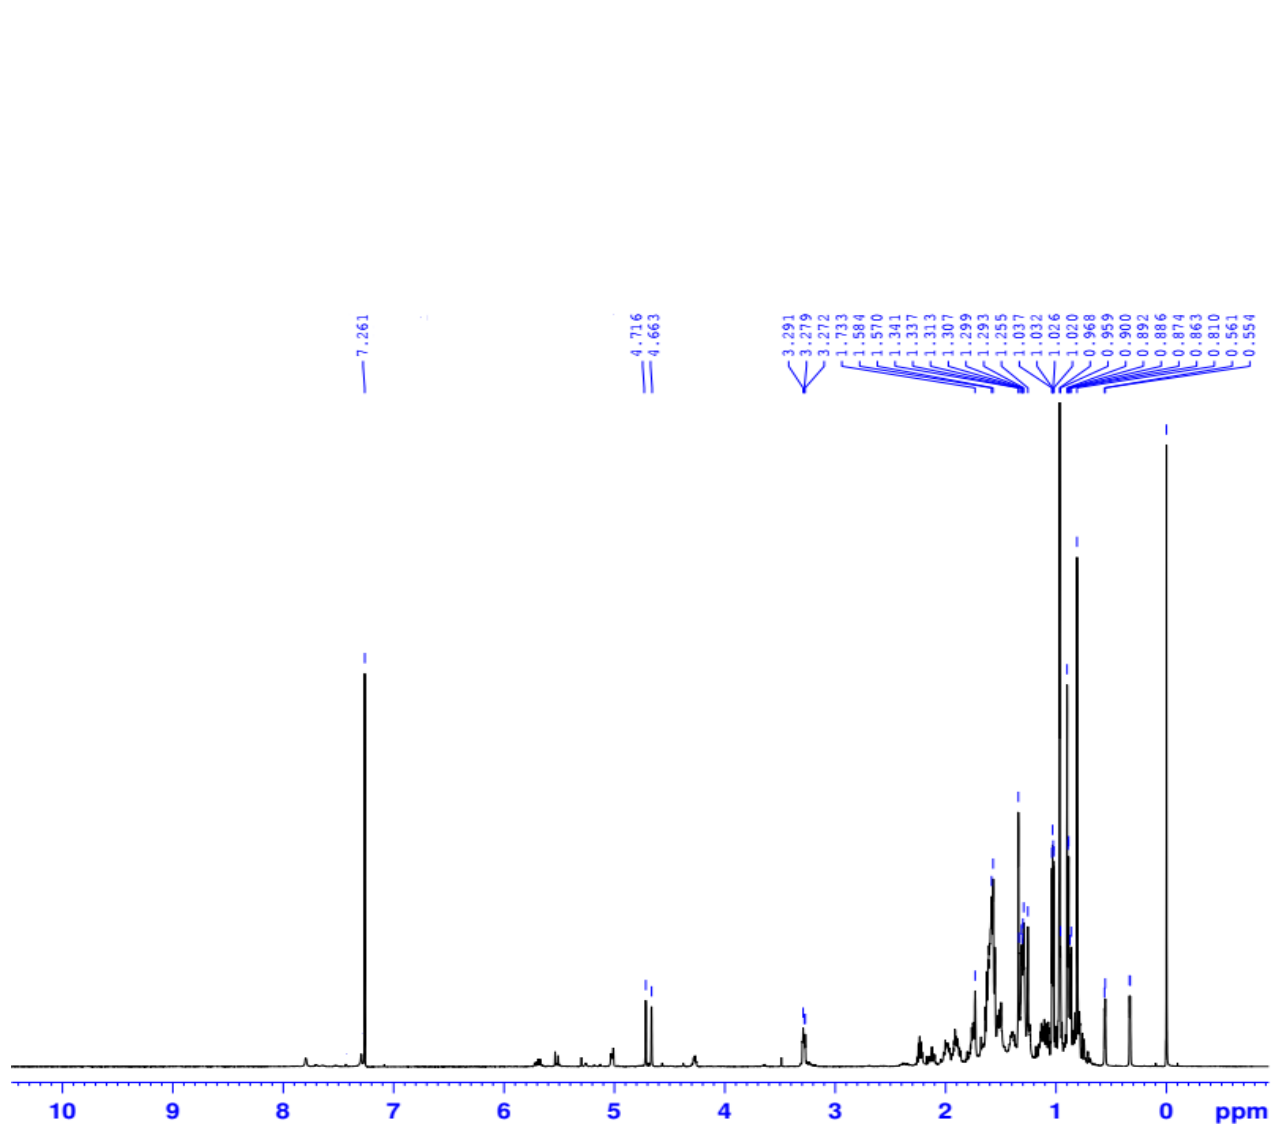

Figure S1. <sup>1</sup>H NMR spectrum (600 MHz, CDCl<sub>3</sub>) of compound 1

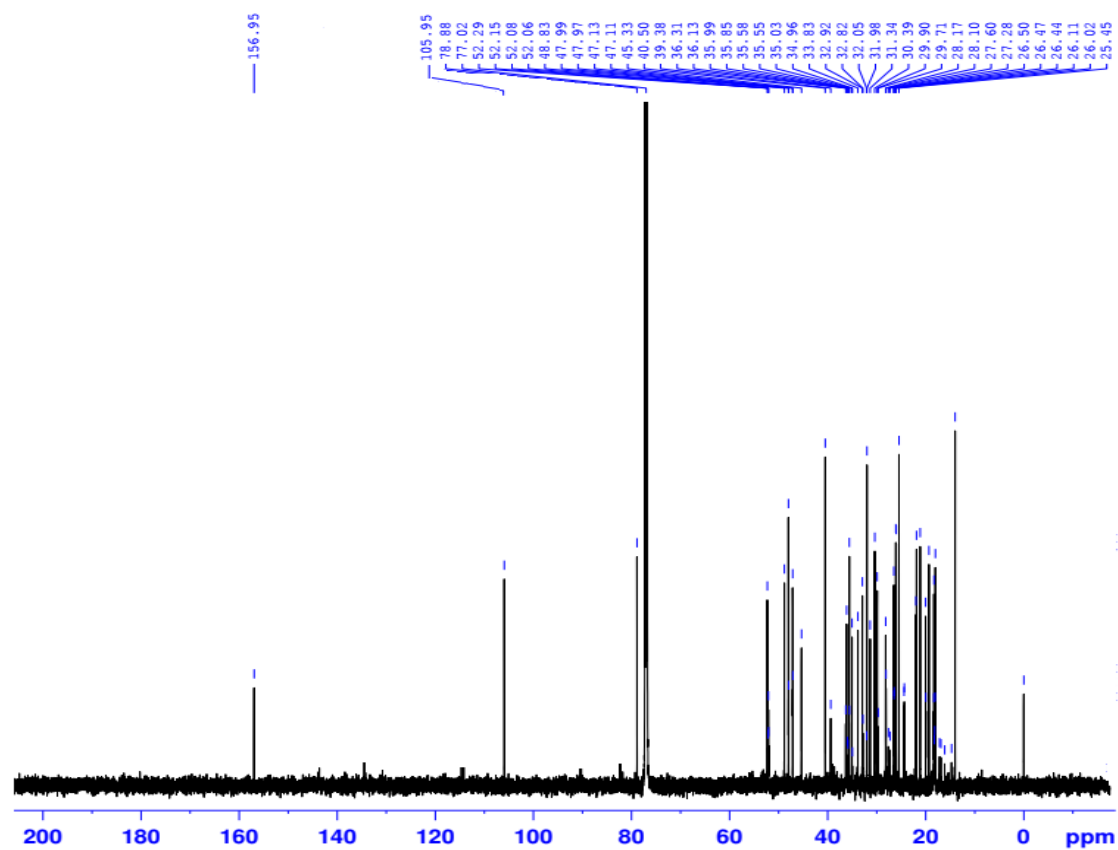

Figure S2.  $^{13}\text{C}$  NMR spectrum (150 MHz,  $\text{CDCl}_3$ ) of compound 1

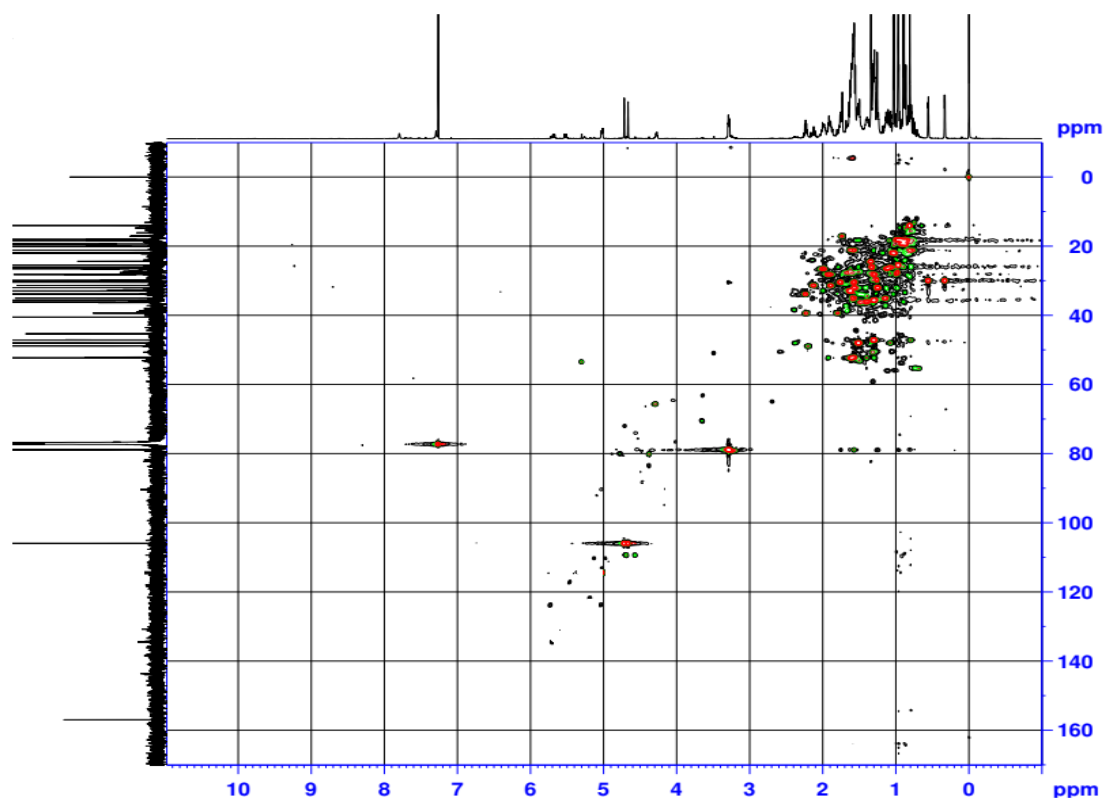

Figure S3. HSQC spectrum ( $\text{CDCl}_3$ ) of compound 1

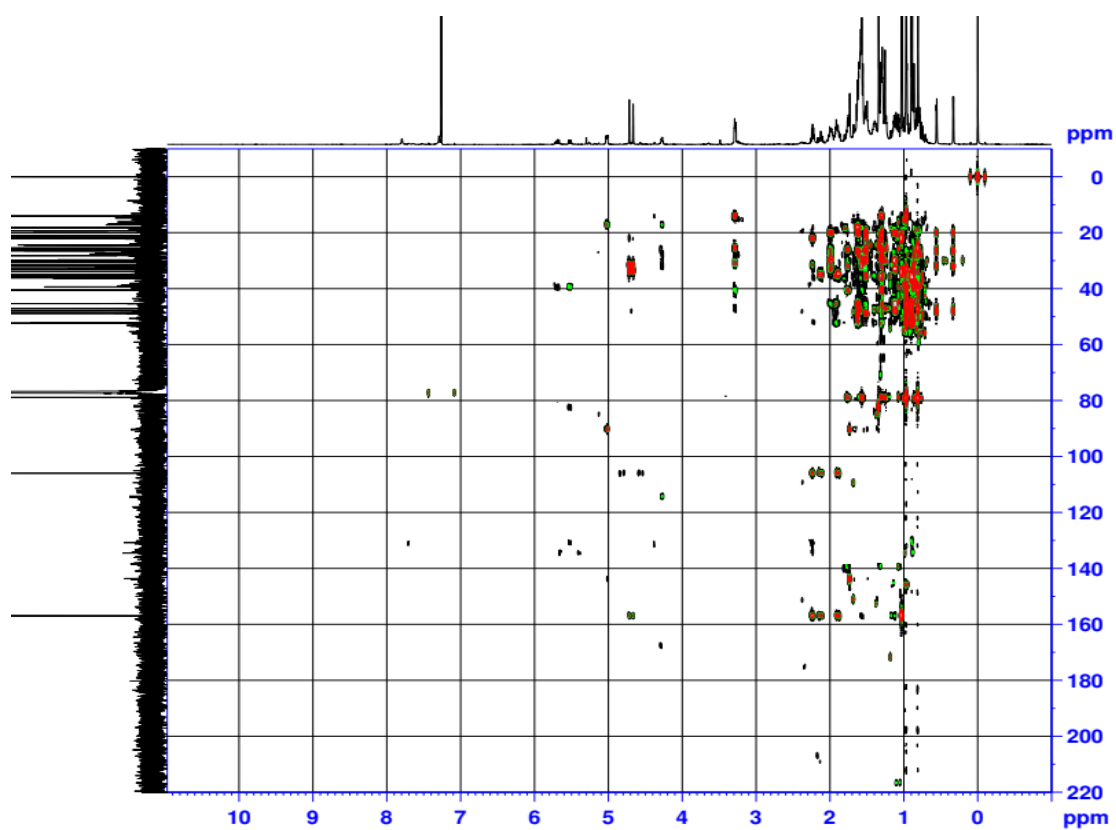

Figure S4. HMBC spectrum ( $\text{CDCl}_3$ ) of compound 1

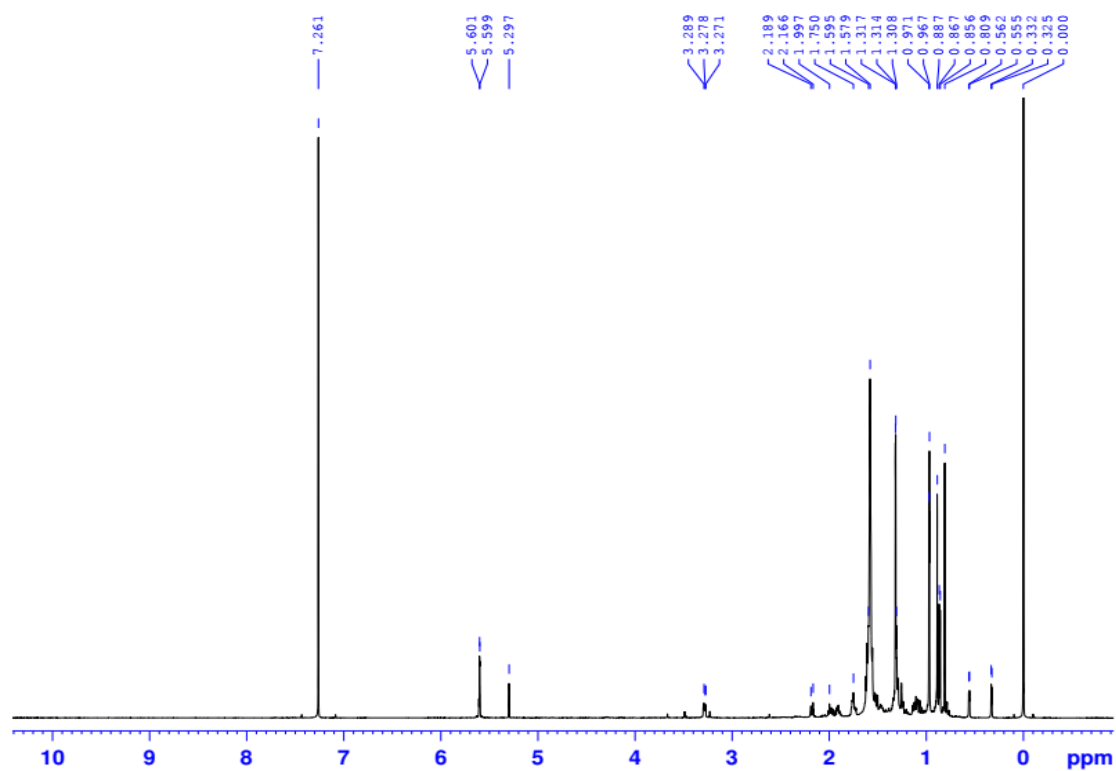

Figure S5.  $^1\text{H}$  NMR spectrum (600 MHz,  $\text{CDCl}_3$ ) of compound 2

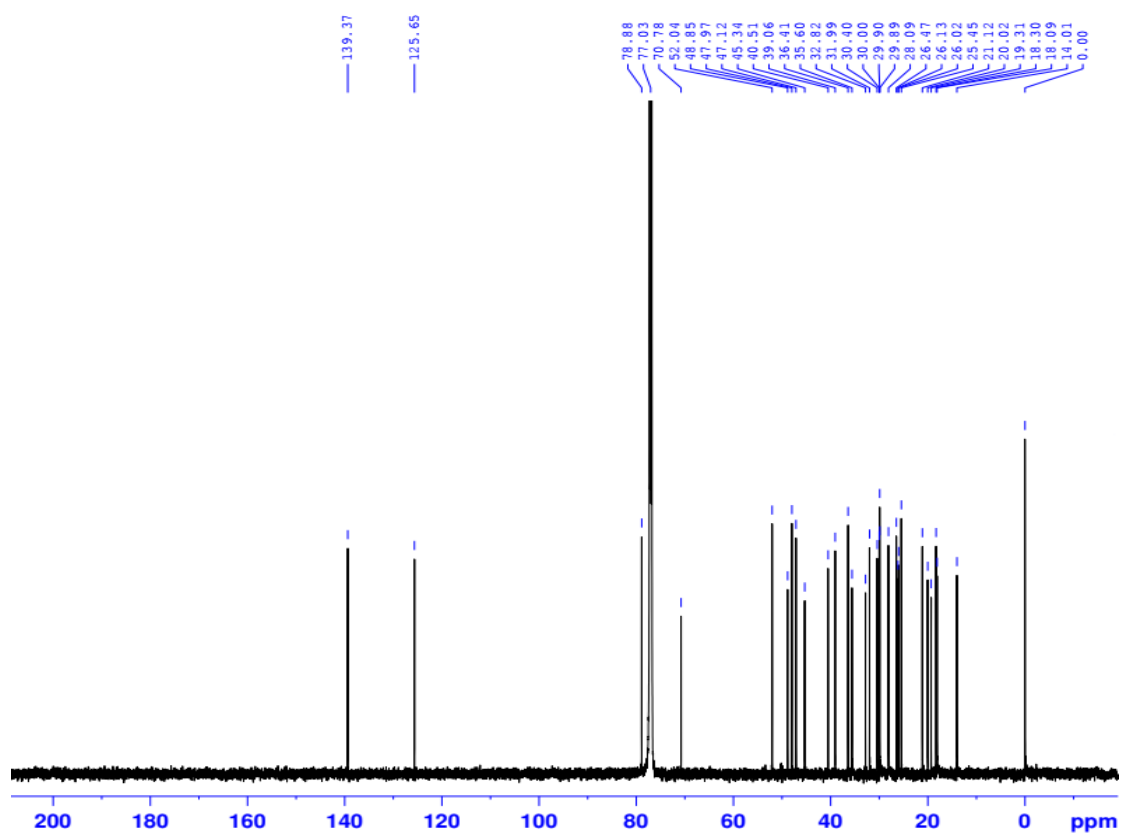

Figure S6.  $^{13}\text{C}$  NMR spectrum (150 MHz,  $\text{CDCl}_3$ ) of compound 2

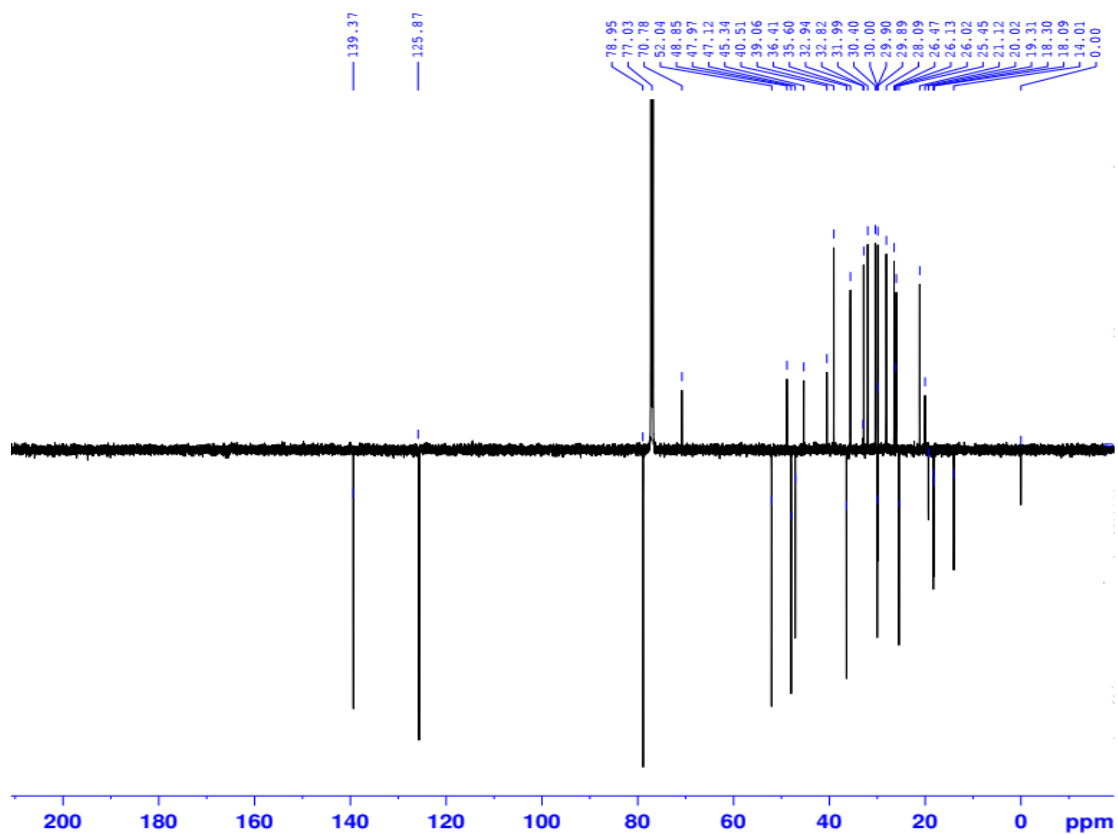

Figure S7. APT spectrum (150 MHz,  $\text{CDCl}_3$ ) of compound 2



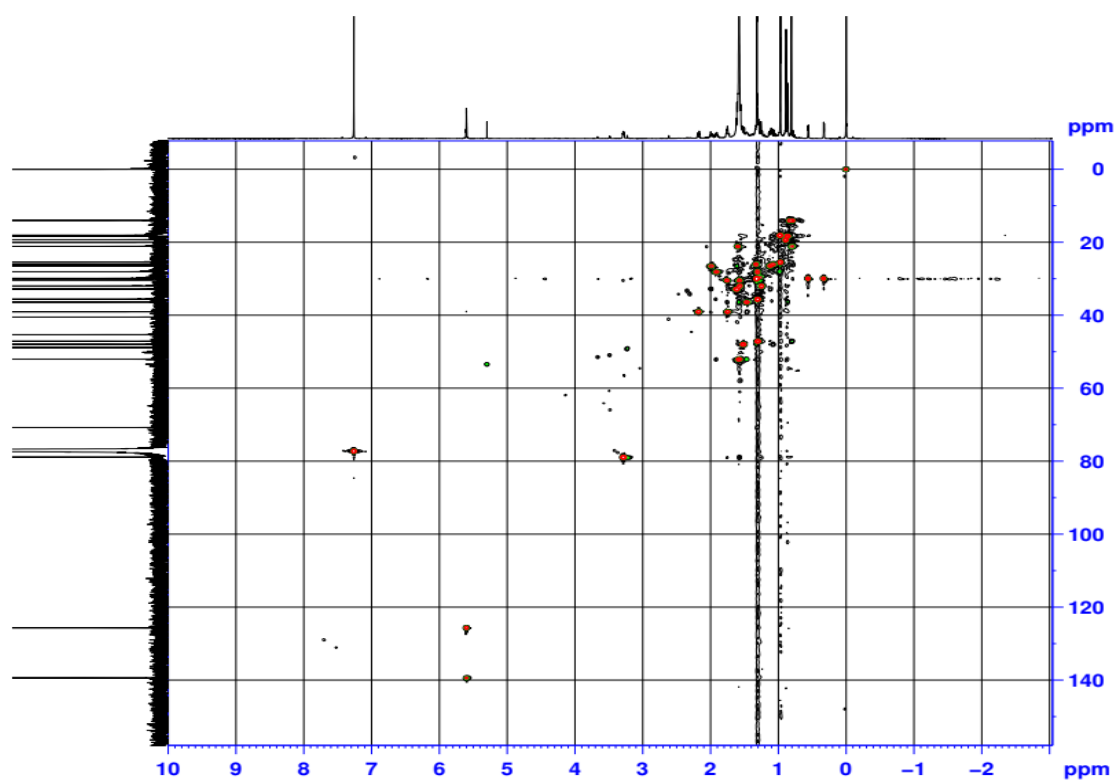

Figure S8. HSQC spectrum (CDCl<sub>3</sub>) of compound 2

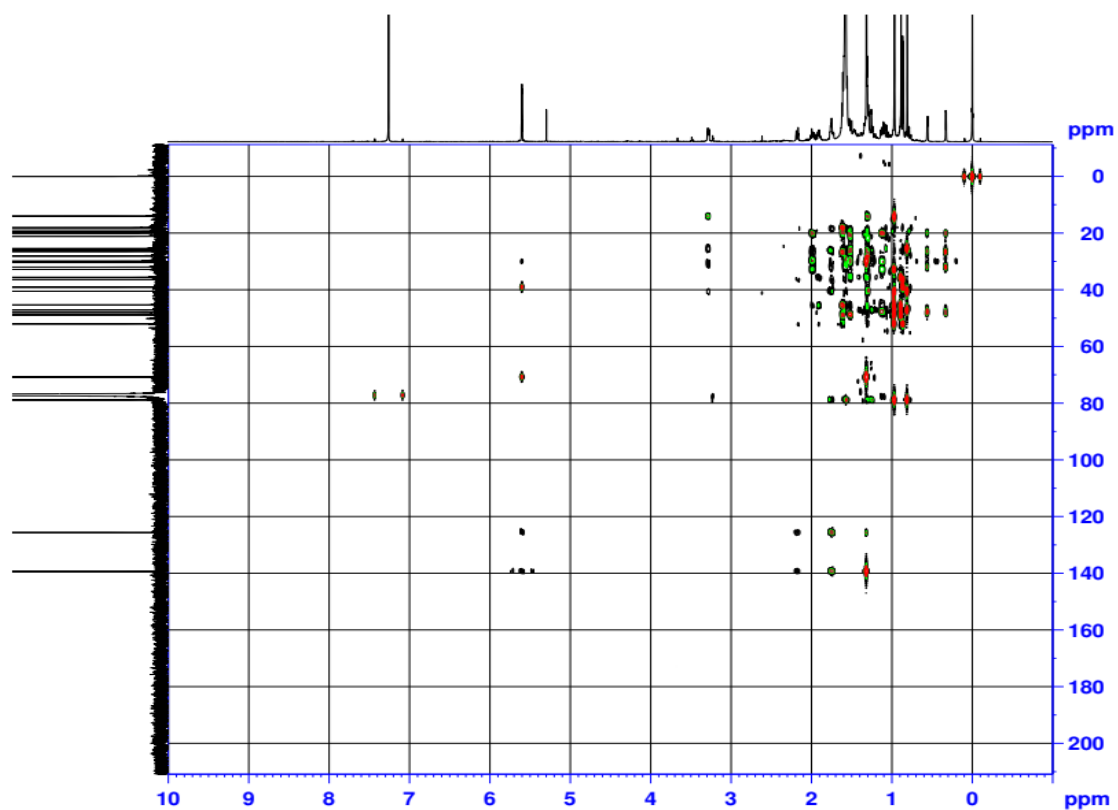

Figure S9. HMBC spectrum (CDCl<sub>3</sub>) of compound 2

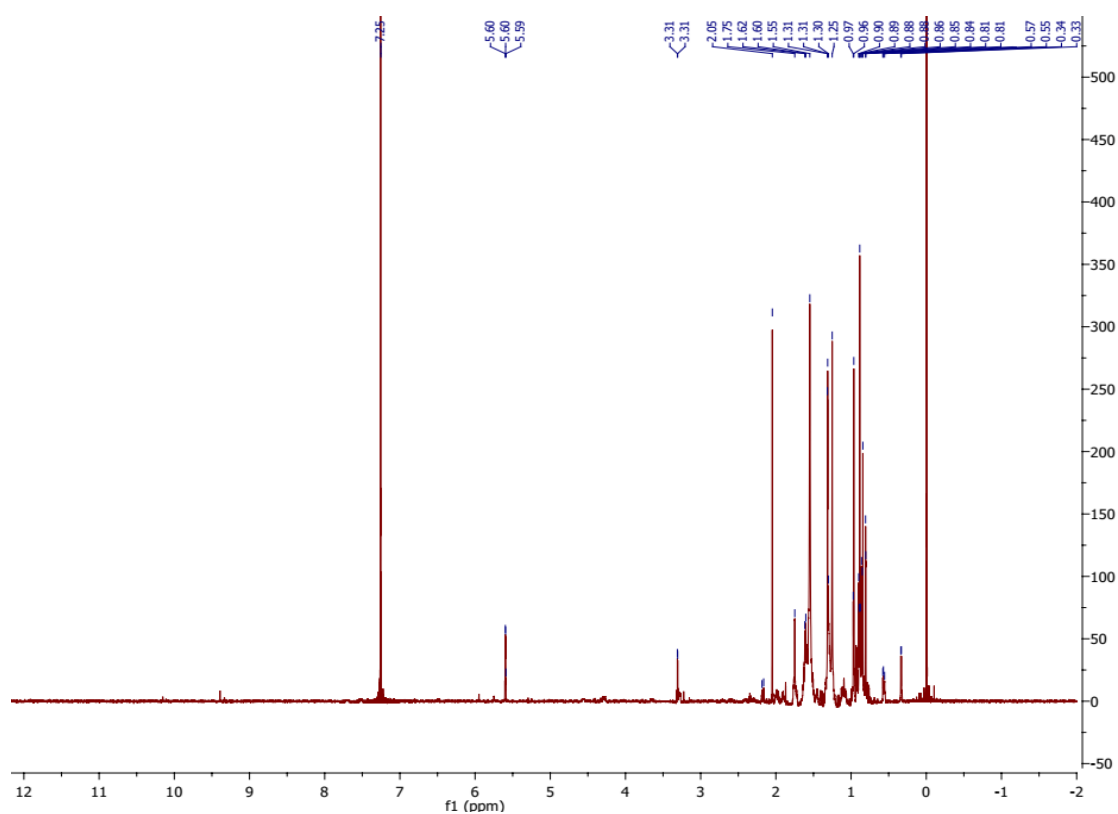

Figure S10. <sup>1</sup>H NMR spectrum (600 MHz, CDCl<sub>3</sub>) of compound 3

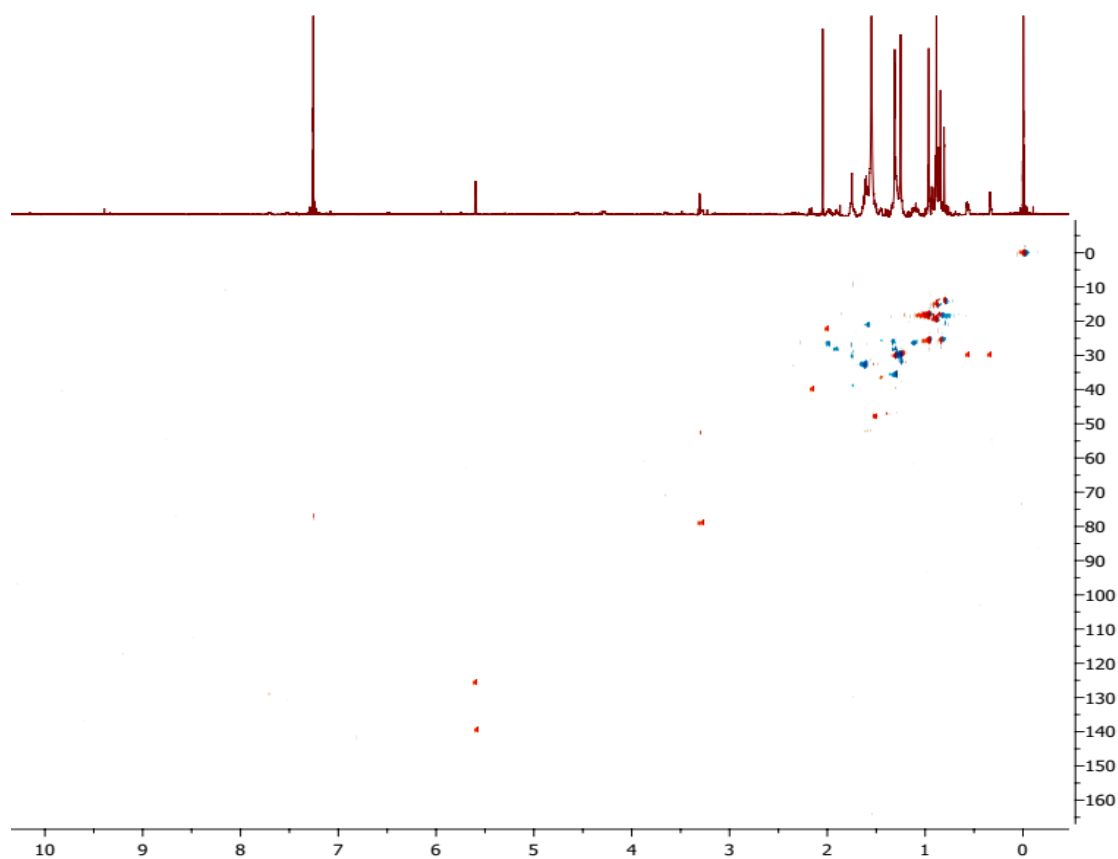

Figure S11. HSQC spectrum (CDCl<sub>3</sub>) of compound 3

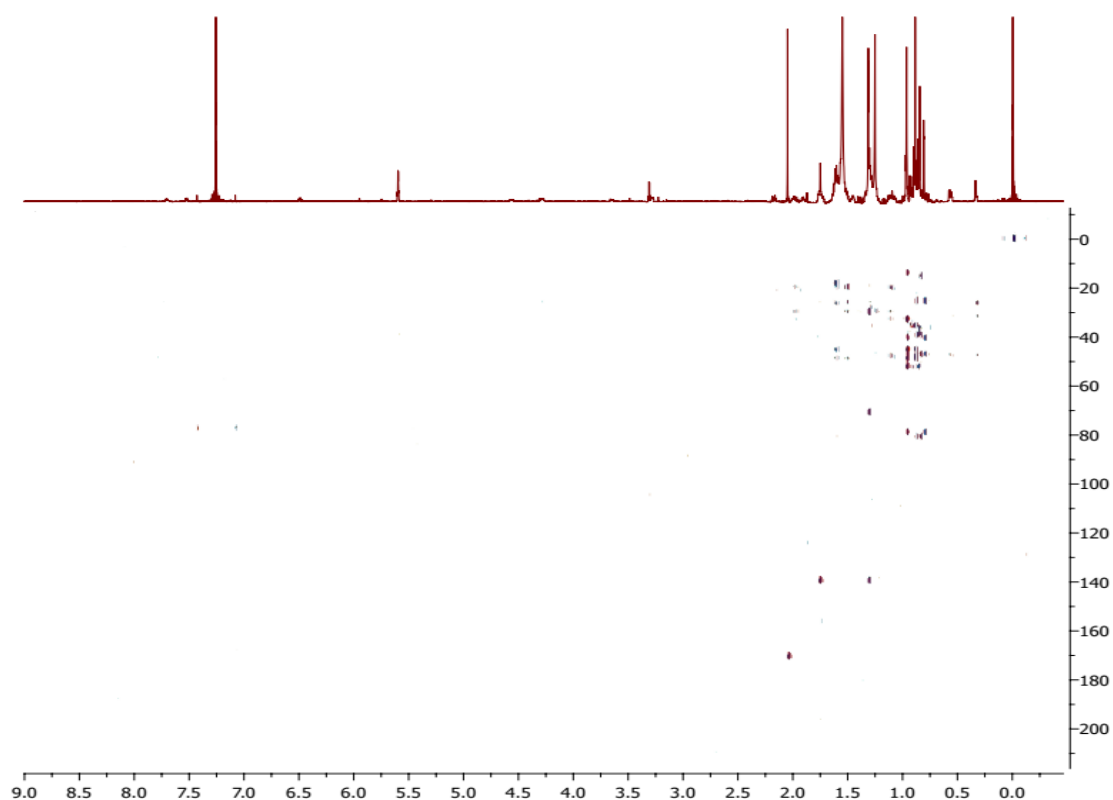

Figure S12. HMBC spectrum (CDCl<sub>3</sub>) of compound 3

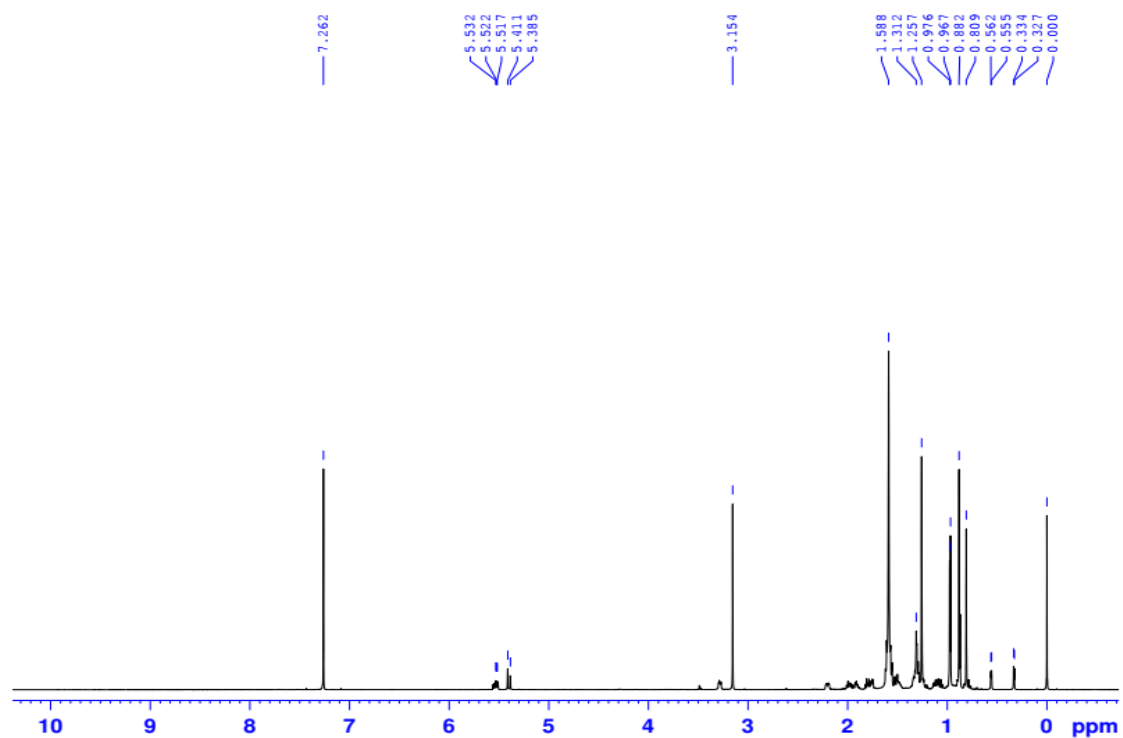

Figure S13. <sup>1</sup>H NMR spectrum (600 MHz, CDCl<sub>3</sub>) of compound 4

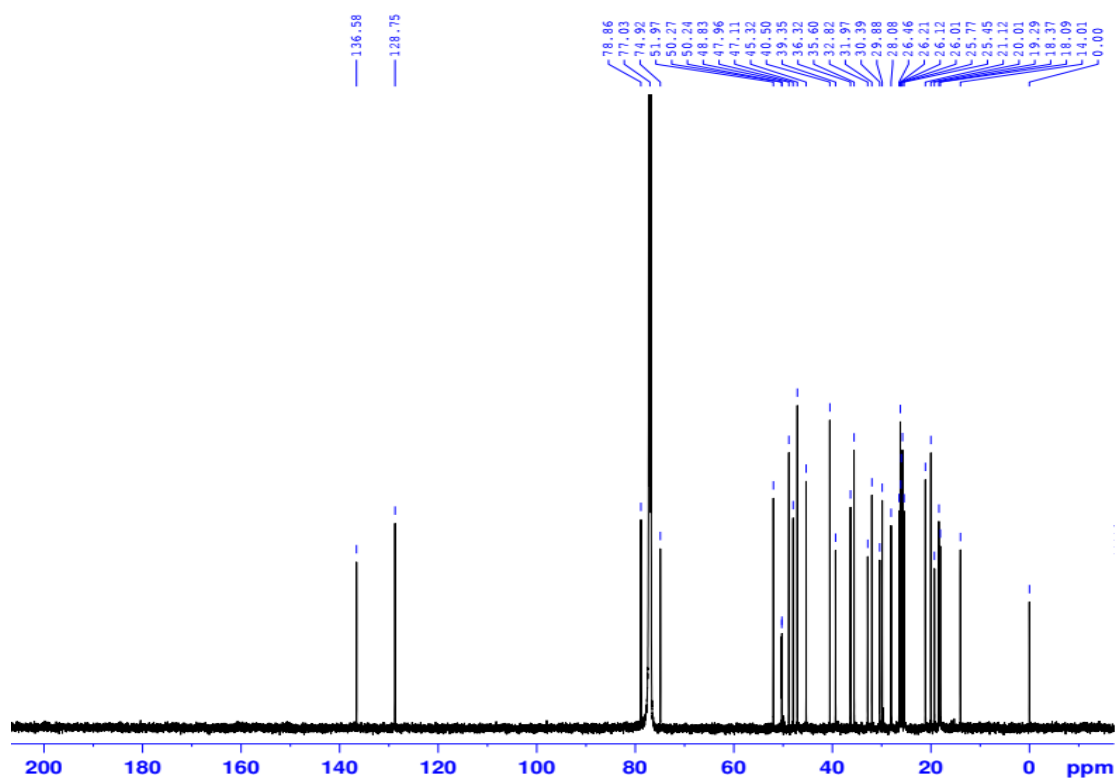

Figure S14.  $^{13}\text{C}$  NMR spectrum (150 MHz,  $\text{CDCl}_3$ ) of compound 4

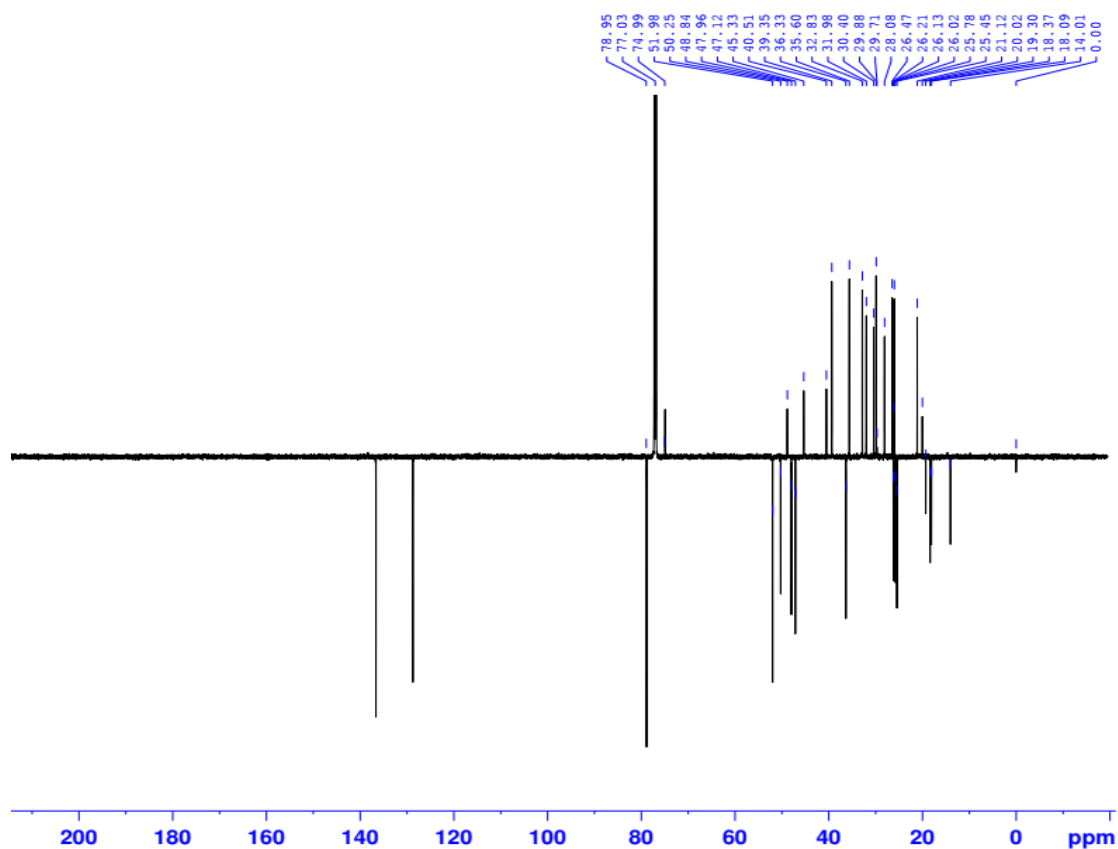

Figure S15. APT spectrum (150 MHz,  $\text{CDCl}_3$ ) of compound 4

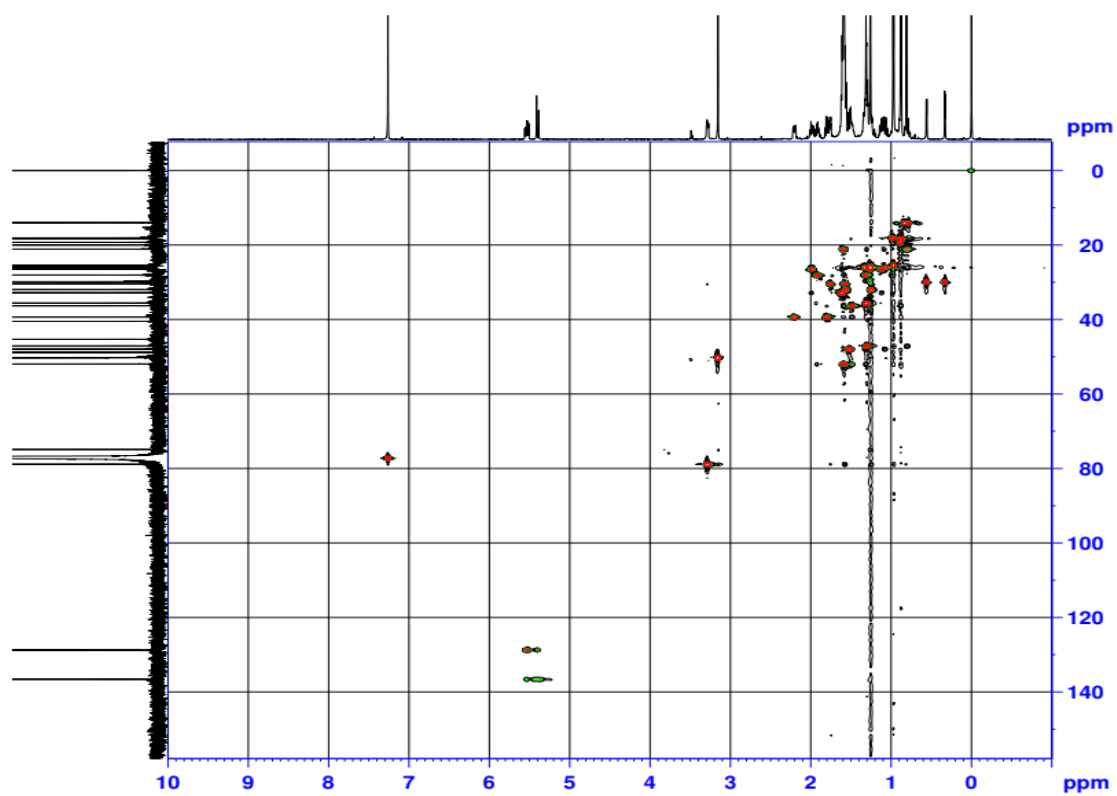

Figure S16. HSQC spectrum (CDCl<sub>3</sub>) of compound 4

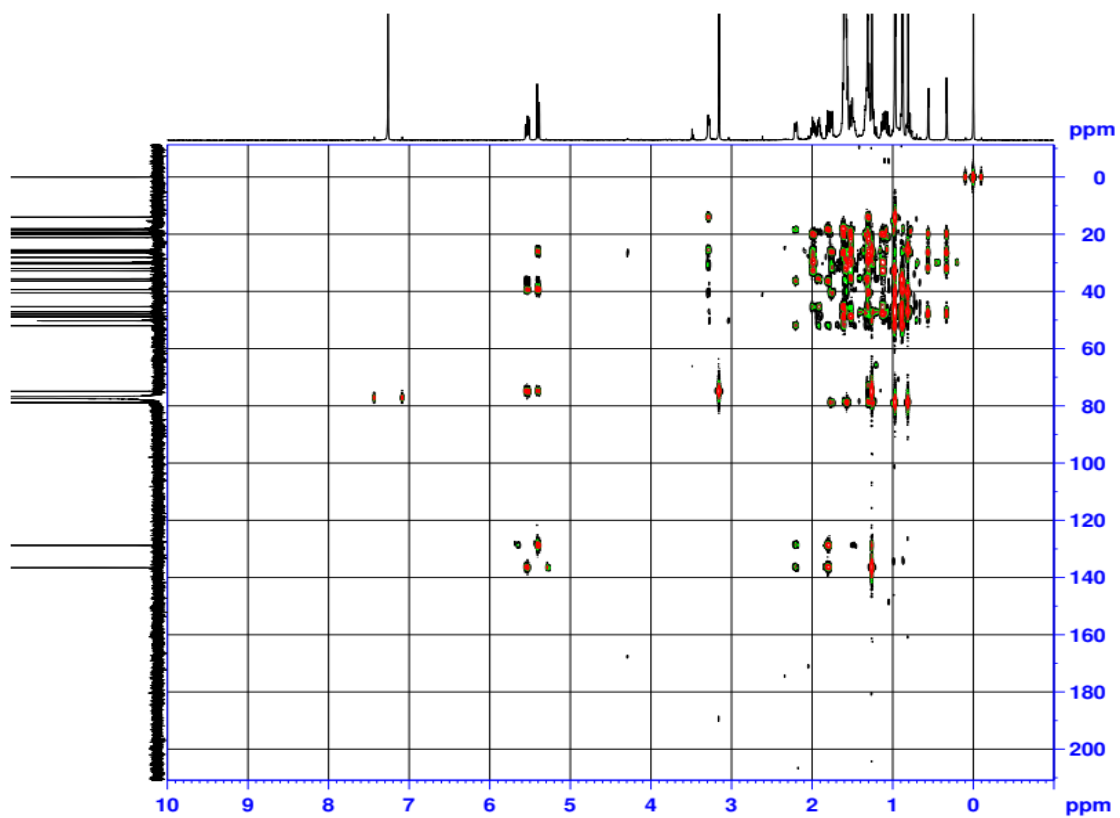

Figure S17. HMBC spectrum (CDCl<sub>3</sub>) of compound 4

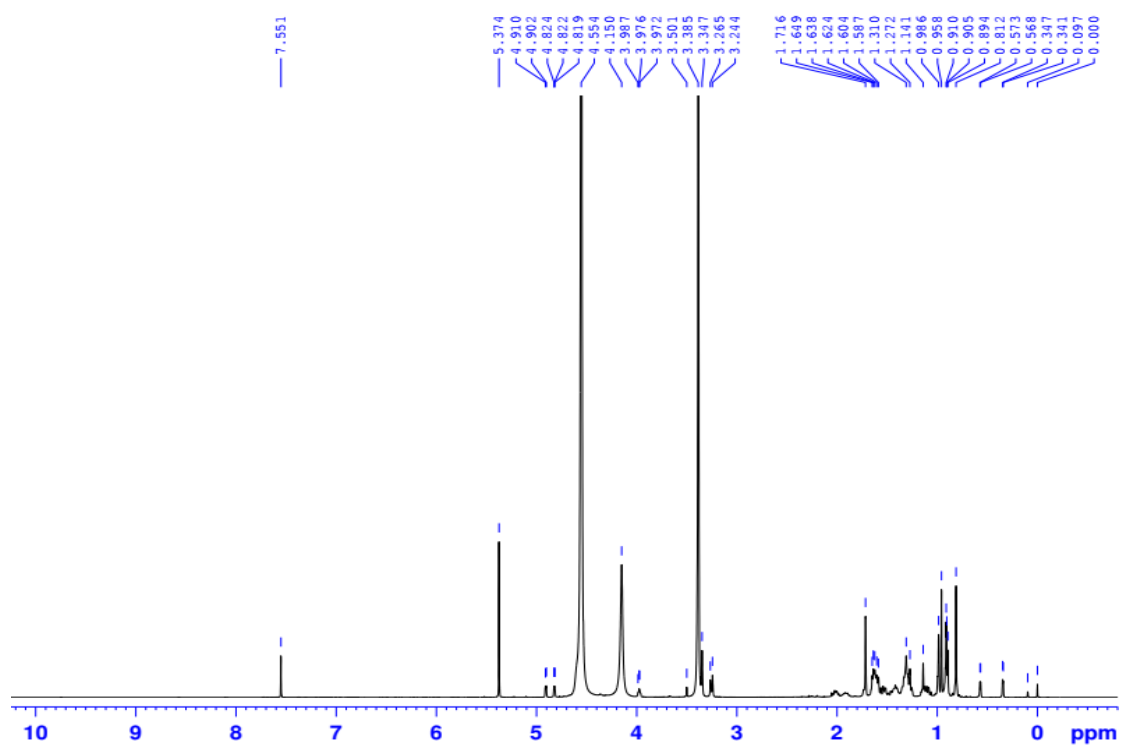

Figure S18. <sup>1</sup>H NMR spectrum (600 MHz, CD<sub>3</sub>OD & CDCl<sub>3</sub>) of compound 5

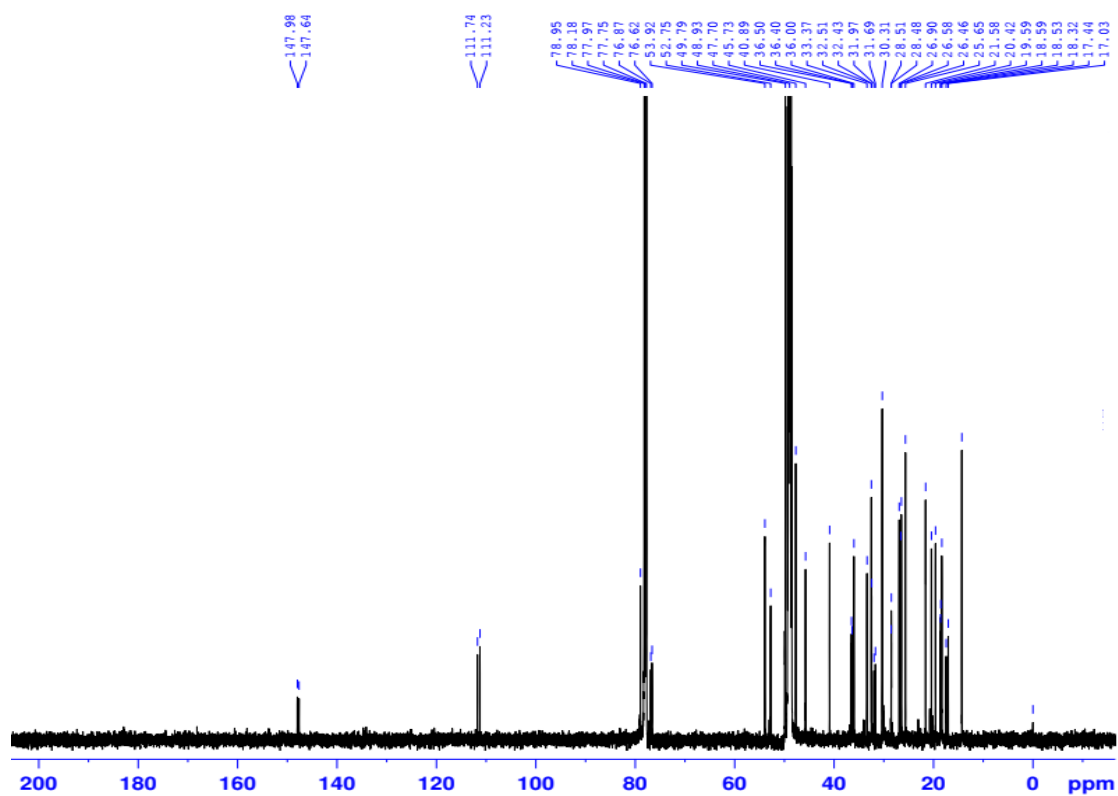

Figure S19. <sup>13</sup>C NMR spectrum (150 MHz, CD<sub>3</sub>OD & CDCl<sub>3</sub>) of compound 5

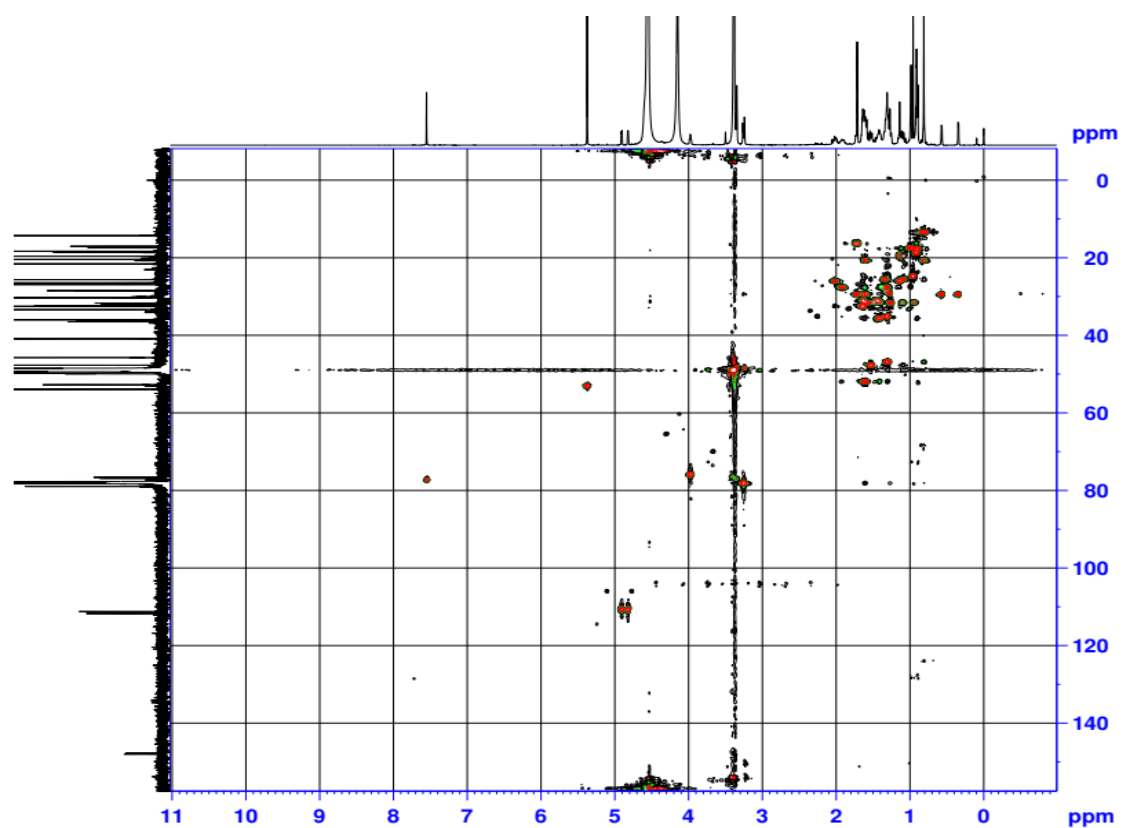

Figure S20. HSQC spectrum (CD<sub>3</sub>OD & CDCl<sub>3</sub>) of compound 5

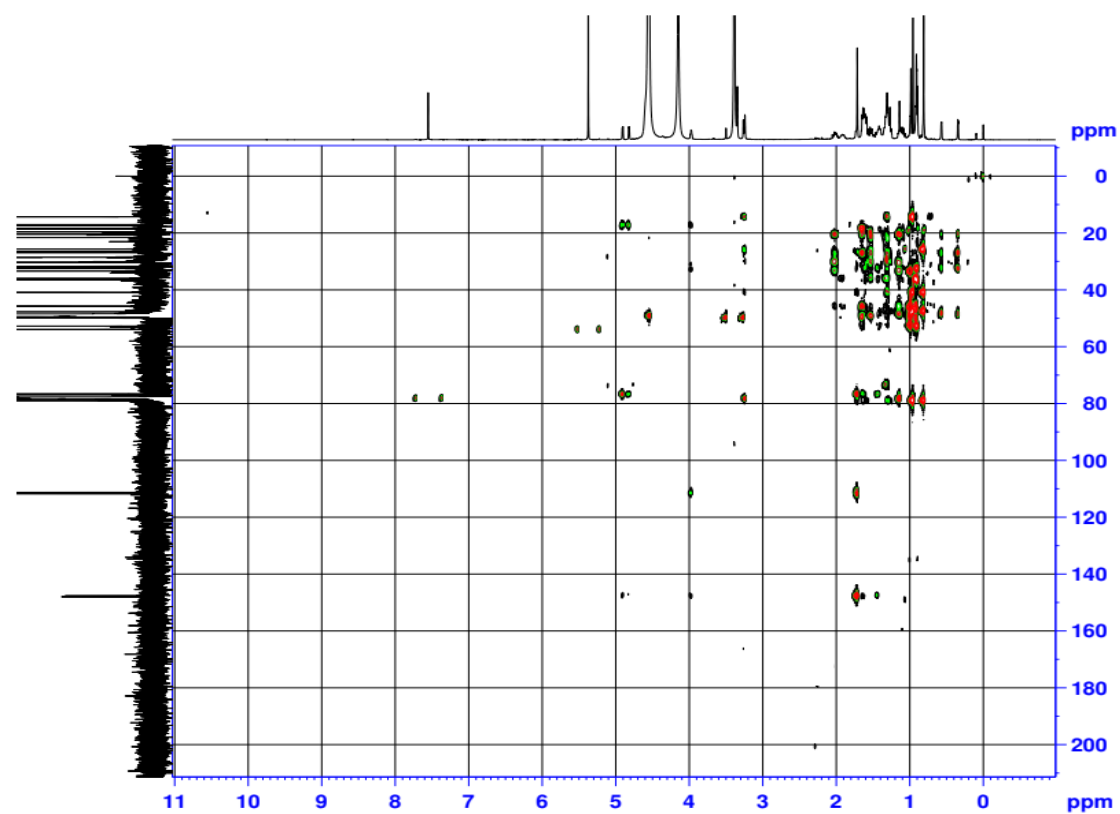

Figure S21. HMBC spectrum (CD<sub>3</sub>OD & CDCl<sub>3</sub>) of compound 5

EEA-6-1H

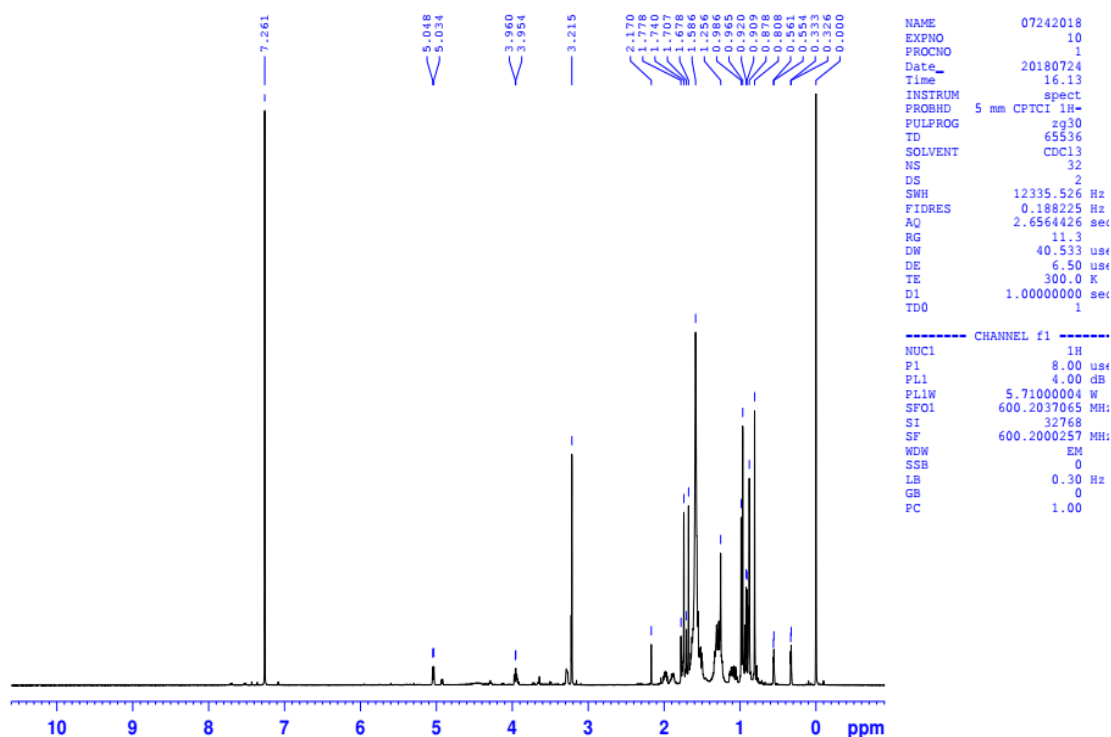

Figure S22.  $^1\text{H}$  NMR spectrum (600 MHz,  $\text{CDCl}_3$ ) of compound 6

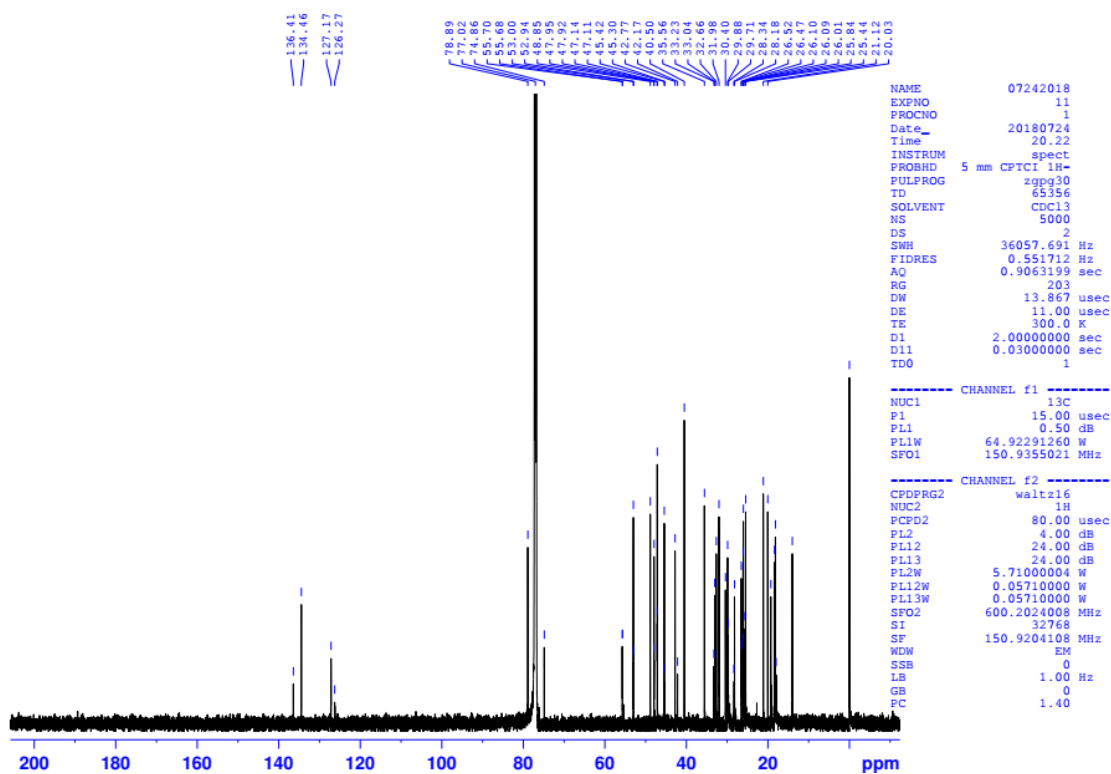

Figure S23.  $^{13}\text{C}$  NMR spectrum (150 MHz,  $\text{CDCl}_3$ ) of compound 6



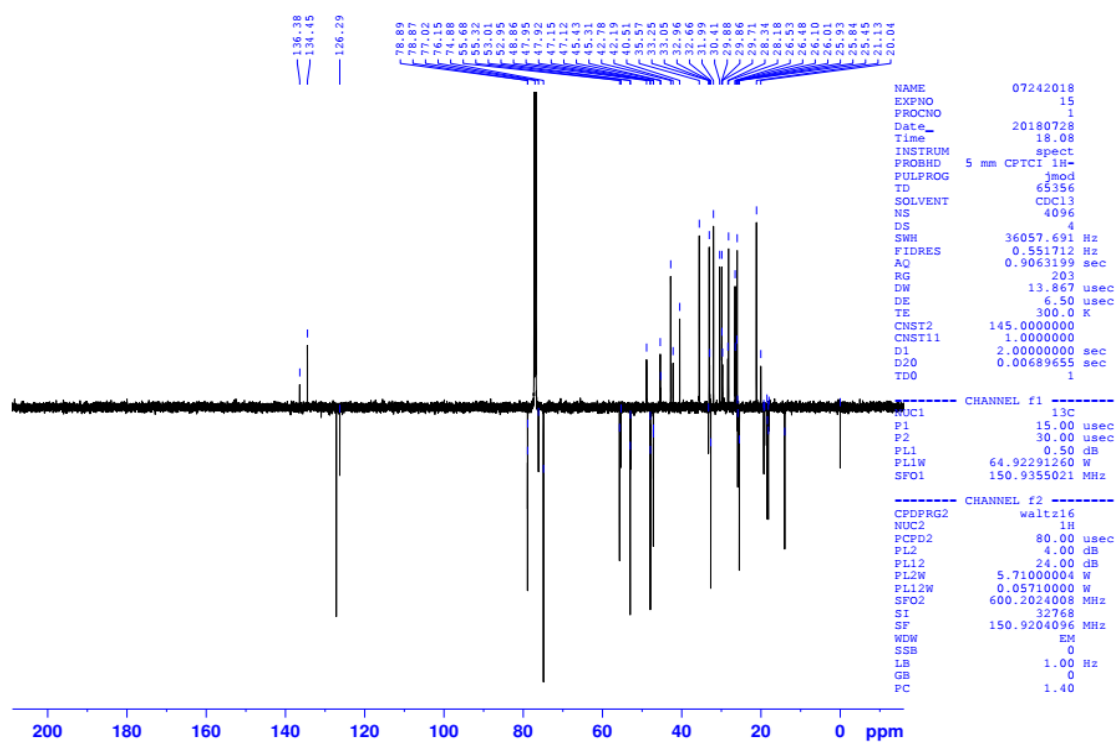

Figure S24. APT spectrum (150 MHz, CDCl<sub>3</sub>) of compound 6

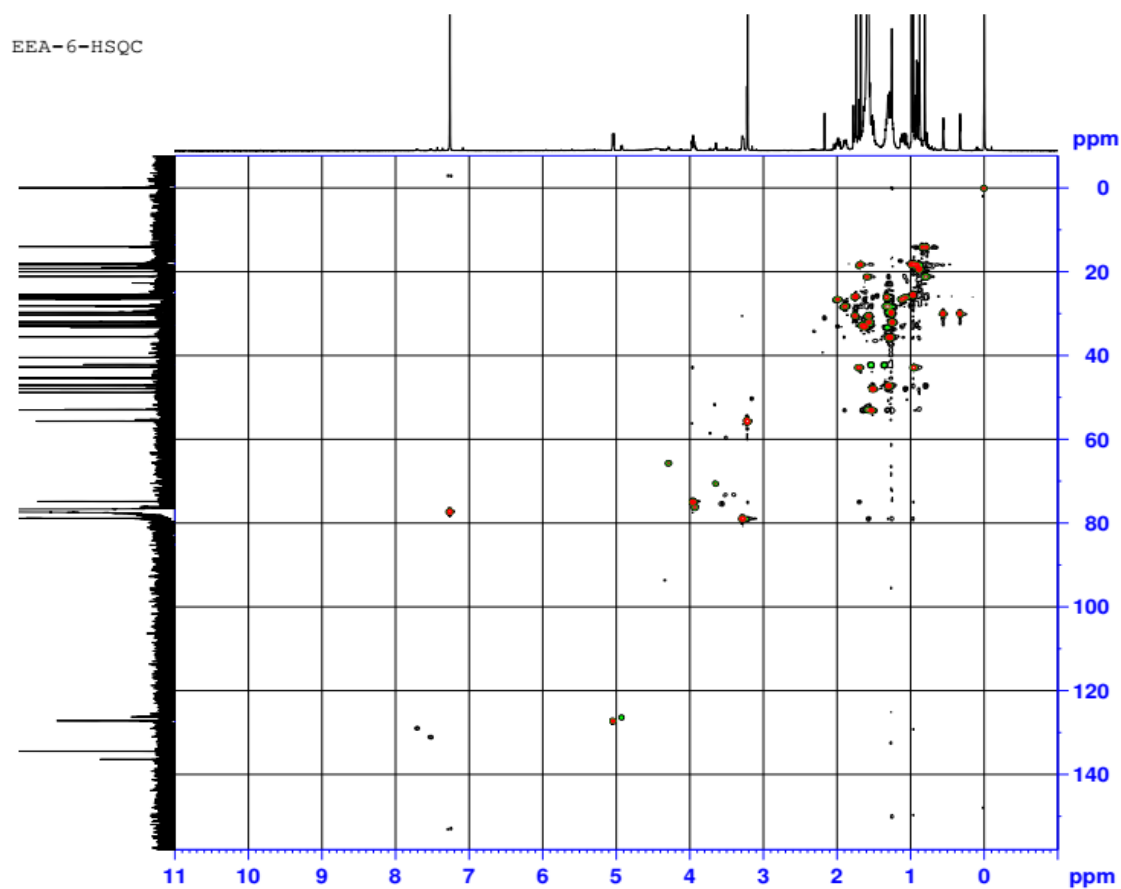

Figure S25. HSQC spectrum (CDCl<sub>3</sub>) of compound 6

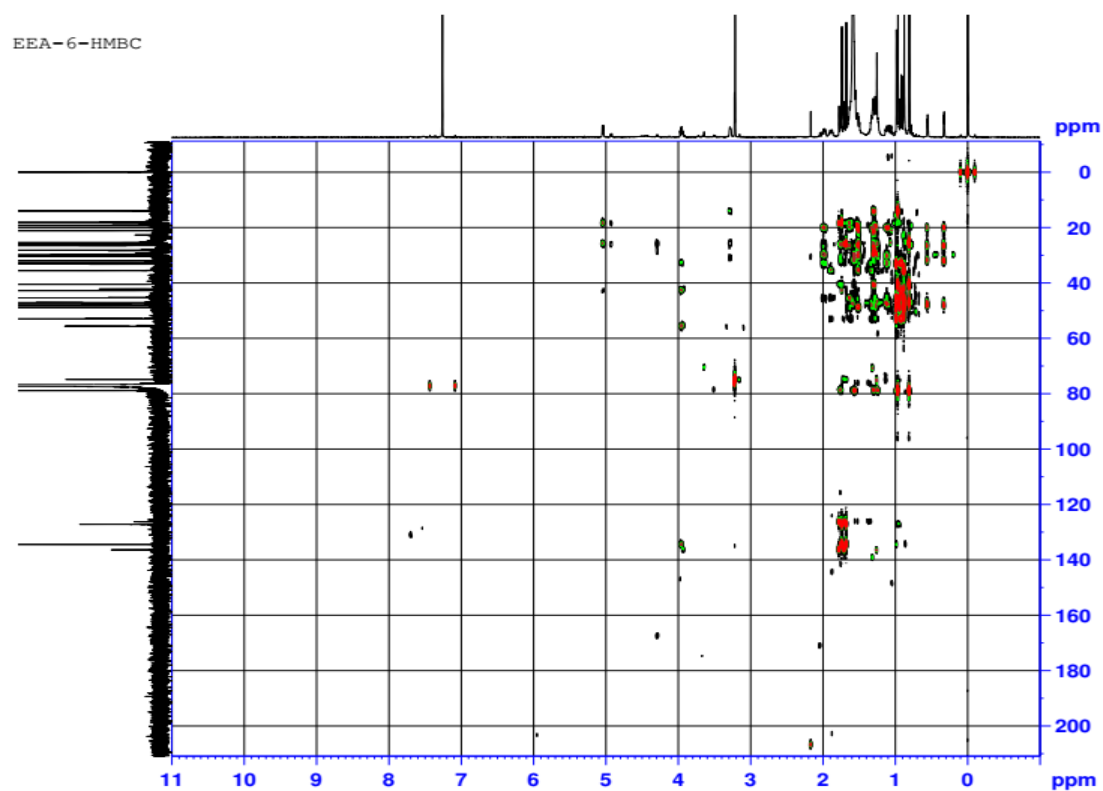

Figure S26. HMBC spectrum ( $\text{CDCl}_3$ ) of compound 6

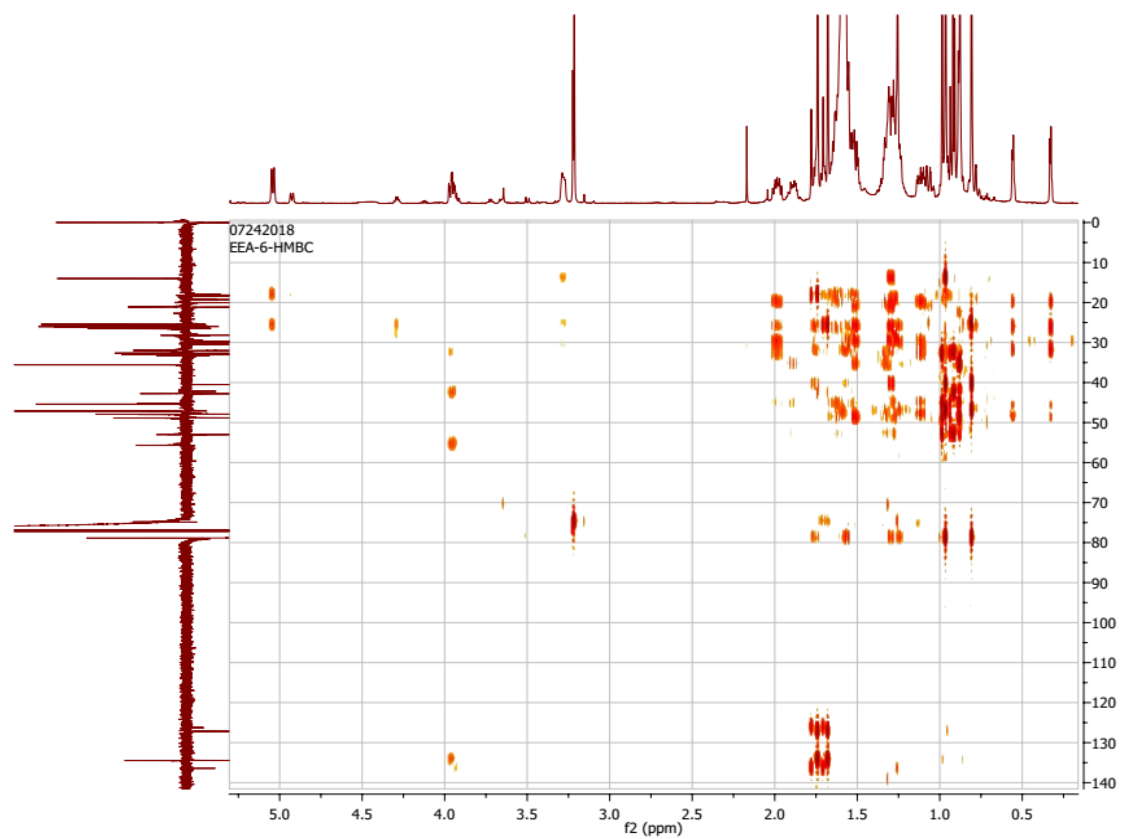

Figure S26-1. Expanded HMBC spectrum ( $\text{CDCl}_3$ ) of compound 6

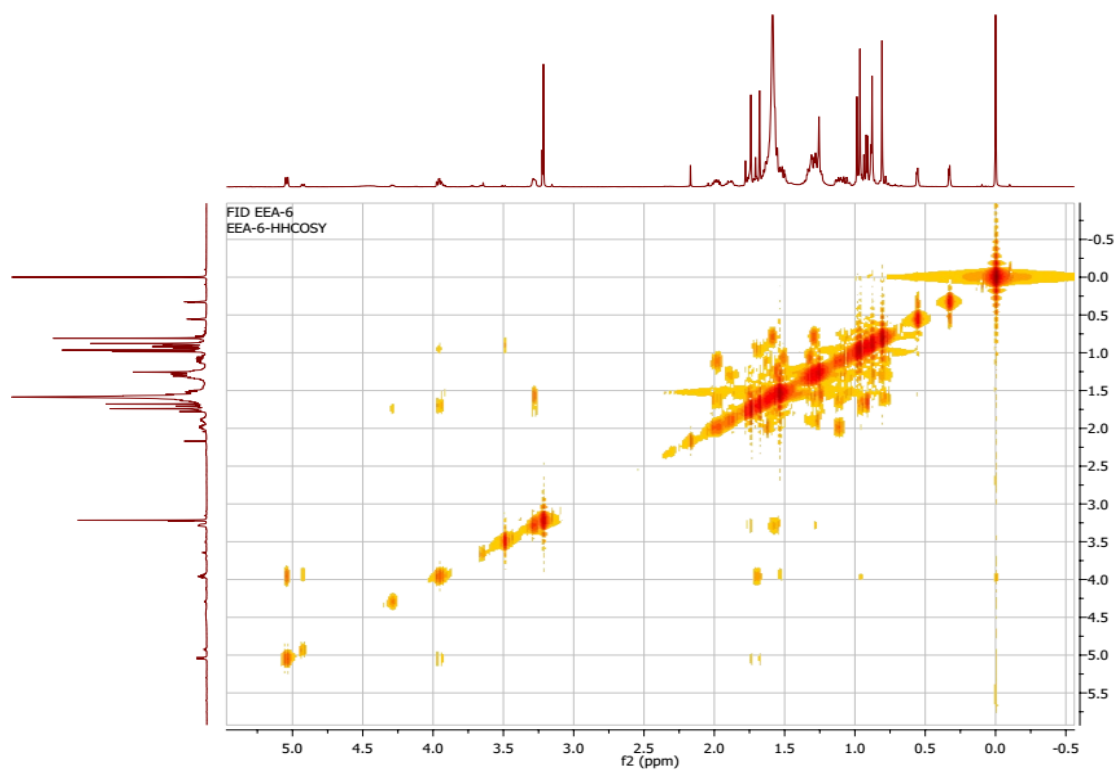

Figure S27.  $^1\text{H}$ - $^1\text{H}$  COSY spectrum ( $\text{CDCl}_3$ ) of compound 6

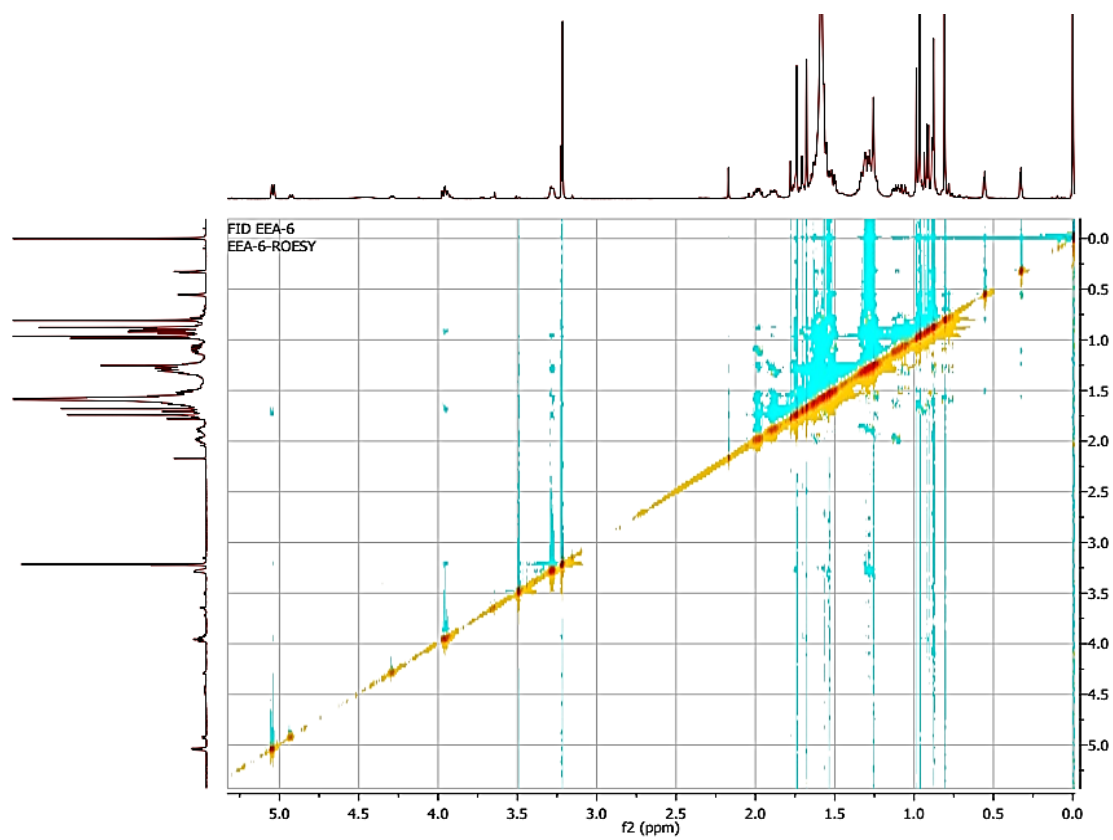

Figure S28. ROESY spectrum ( $\text{CDCl}_3$ ) of compound 6

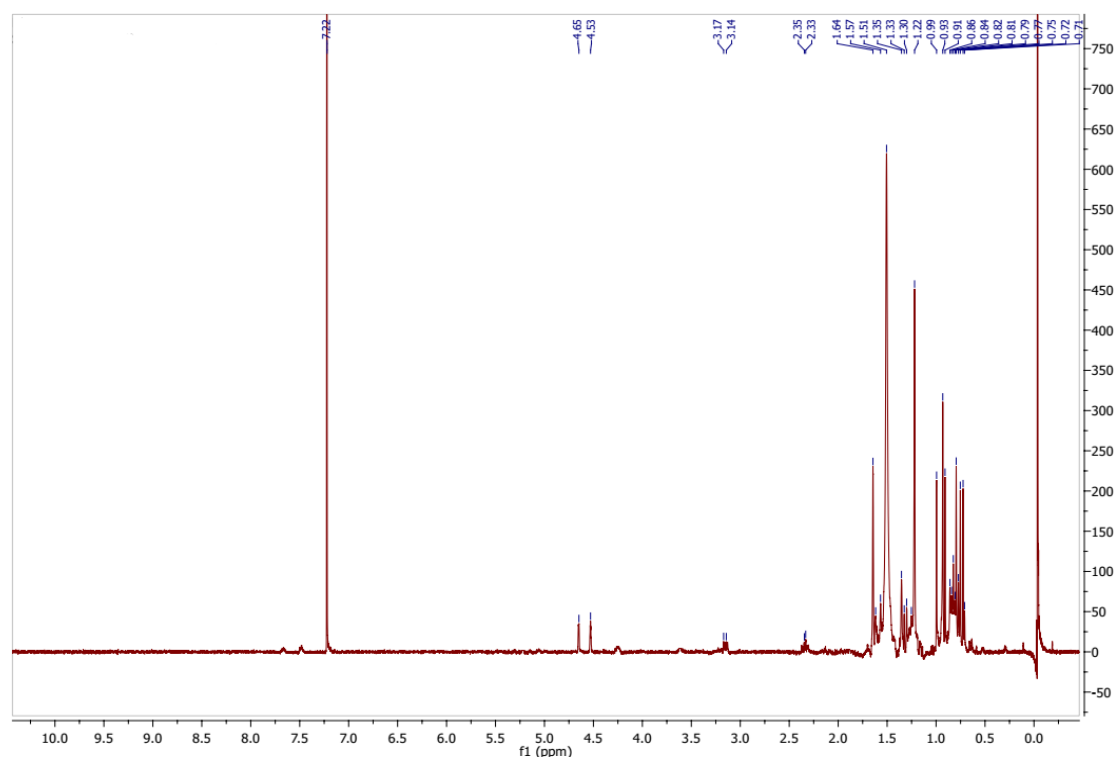

**Figure S29.**  $^1\text{H}$  NMR spectrum (600 MHz,  $\text{CDCl}_3$ ) of compound **7**

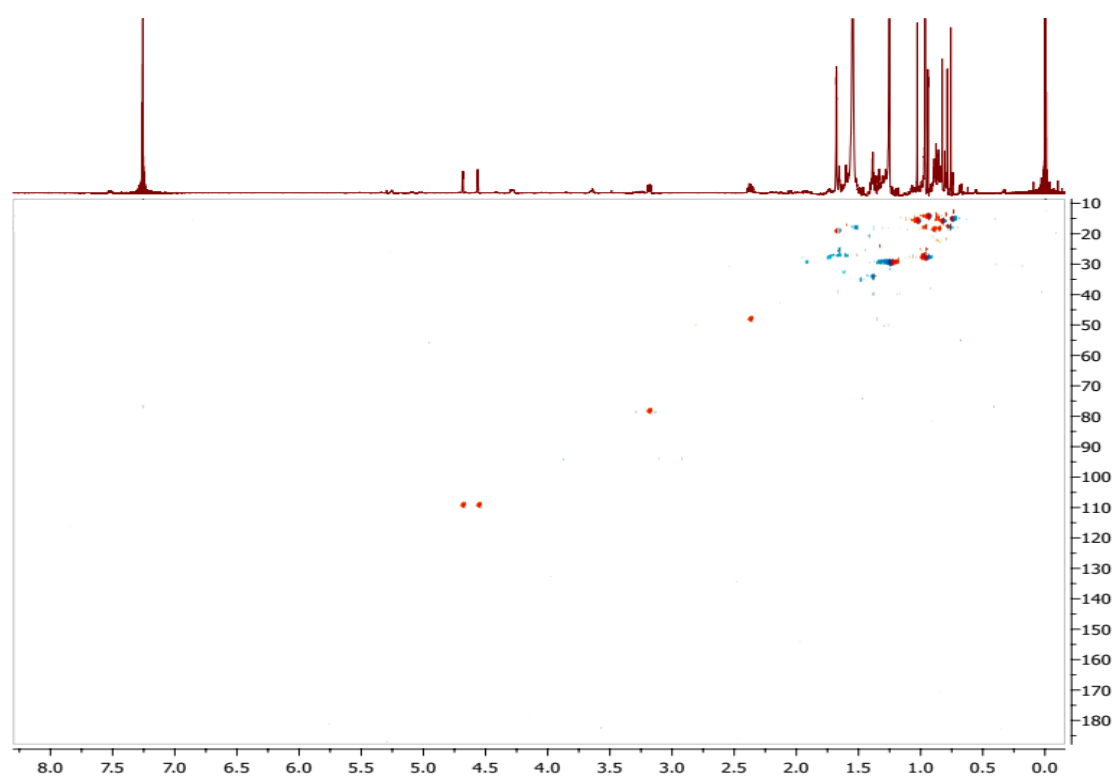

**Figure S30.** HSQC spectrum ( $\text{CDCl}_3$ ) of compound **7**

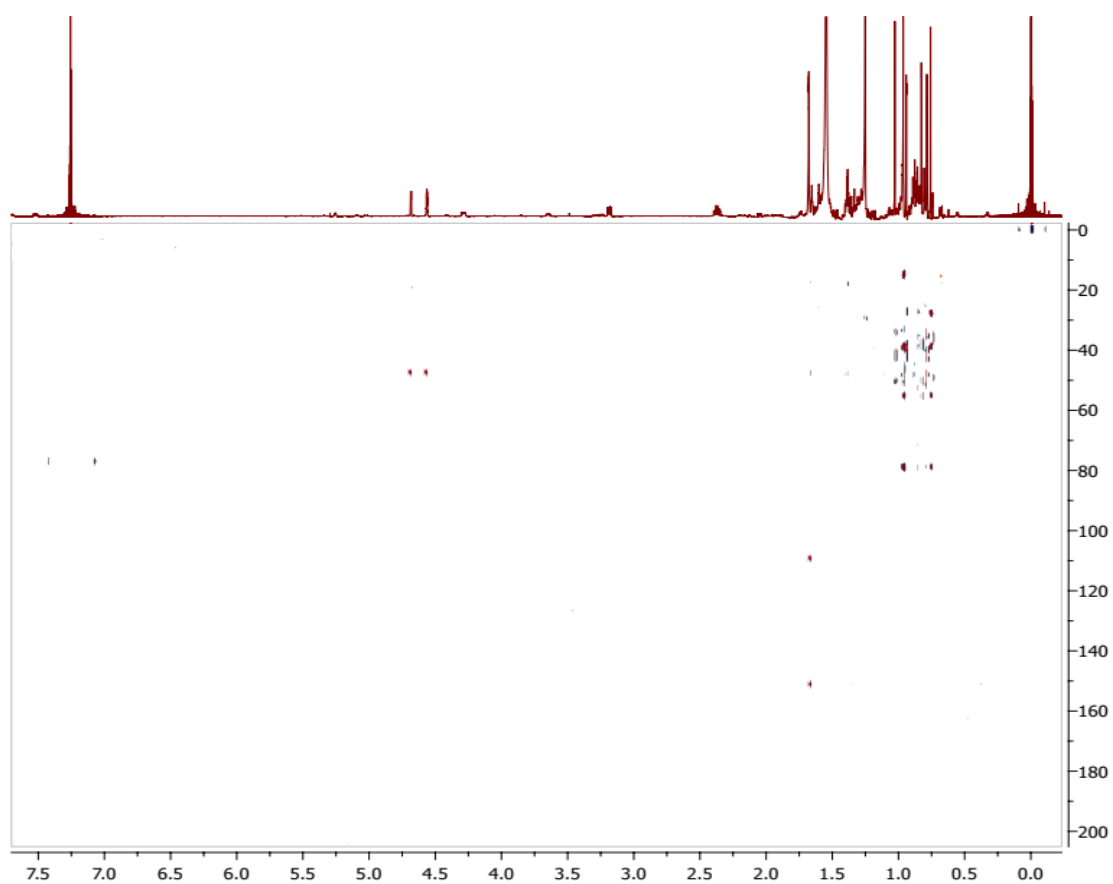

Figure S31. HMBC spectrum (CDCl<sub>3</sub>) of compound 7

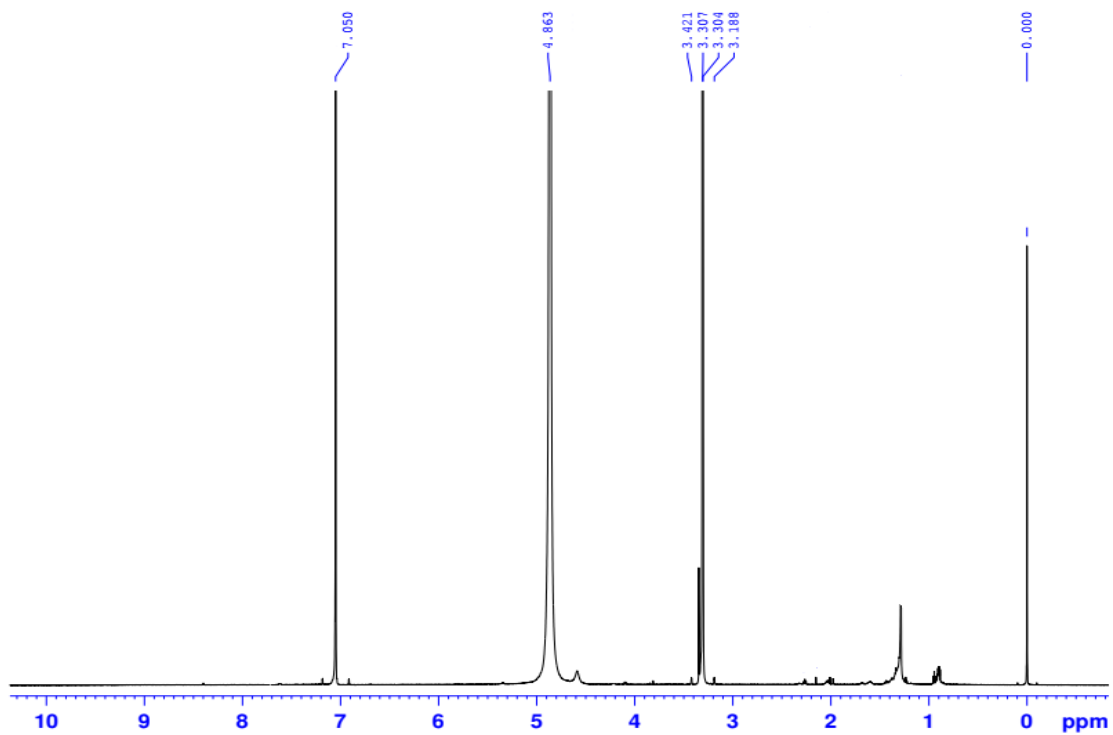

Figure S32. <sup>1</sup>H NMR spectrum (600 MHz, CD<sub>3</sub>OD) of compound 8

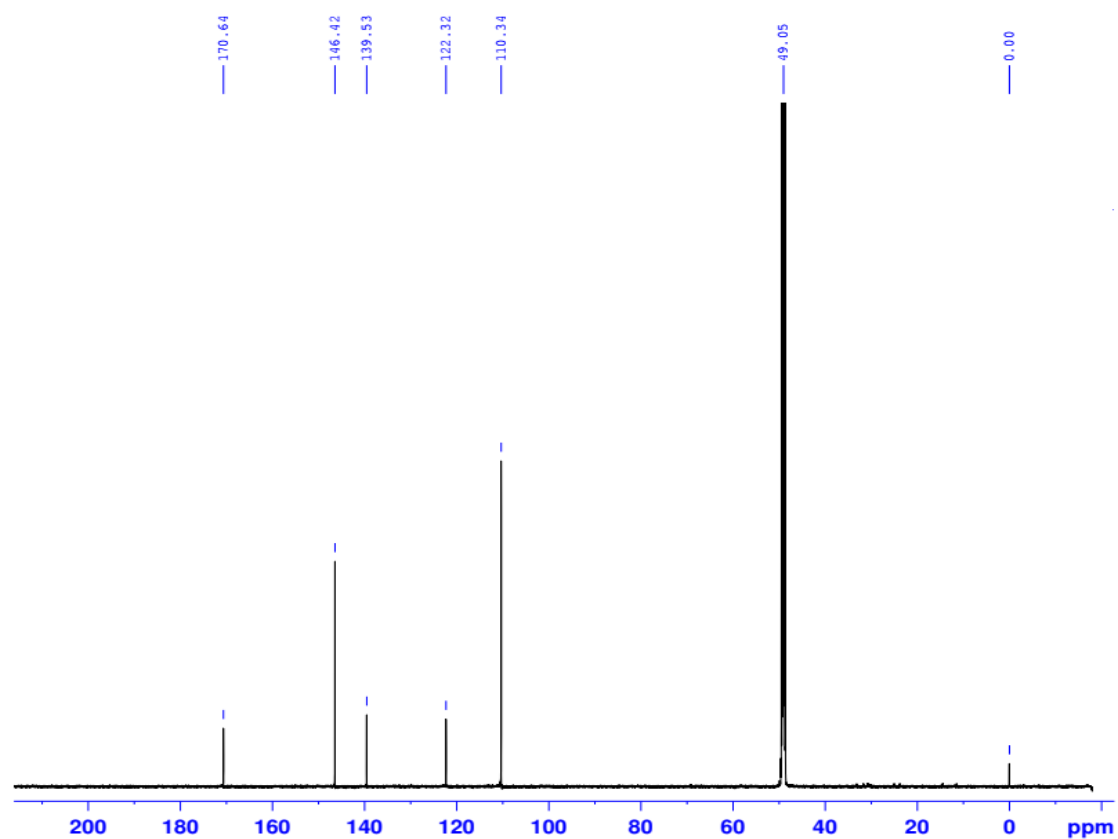

Figure S33. <sup>13</sup>C NMR spectrum (150 MHz, CD<sub>3</sub>OD) of compound 8

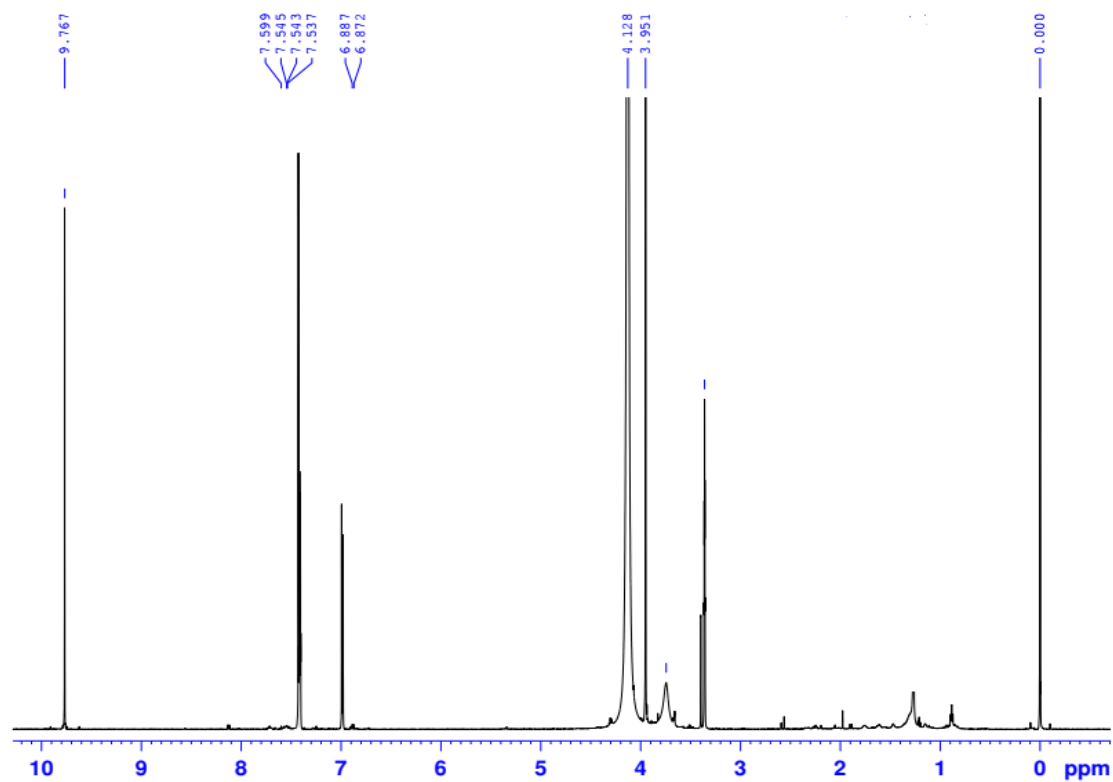

Figure S34. <sup>1</sup>H NMR spectrum (600 MHz, CD<sub>3</sub>OD & CDCl<sub>3</sub>) of compound 9

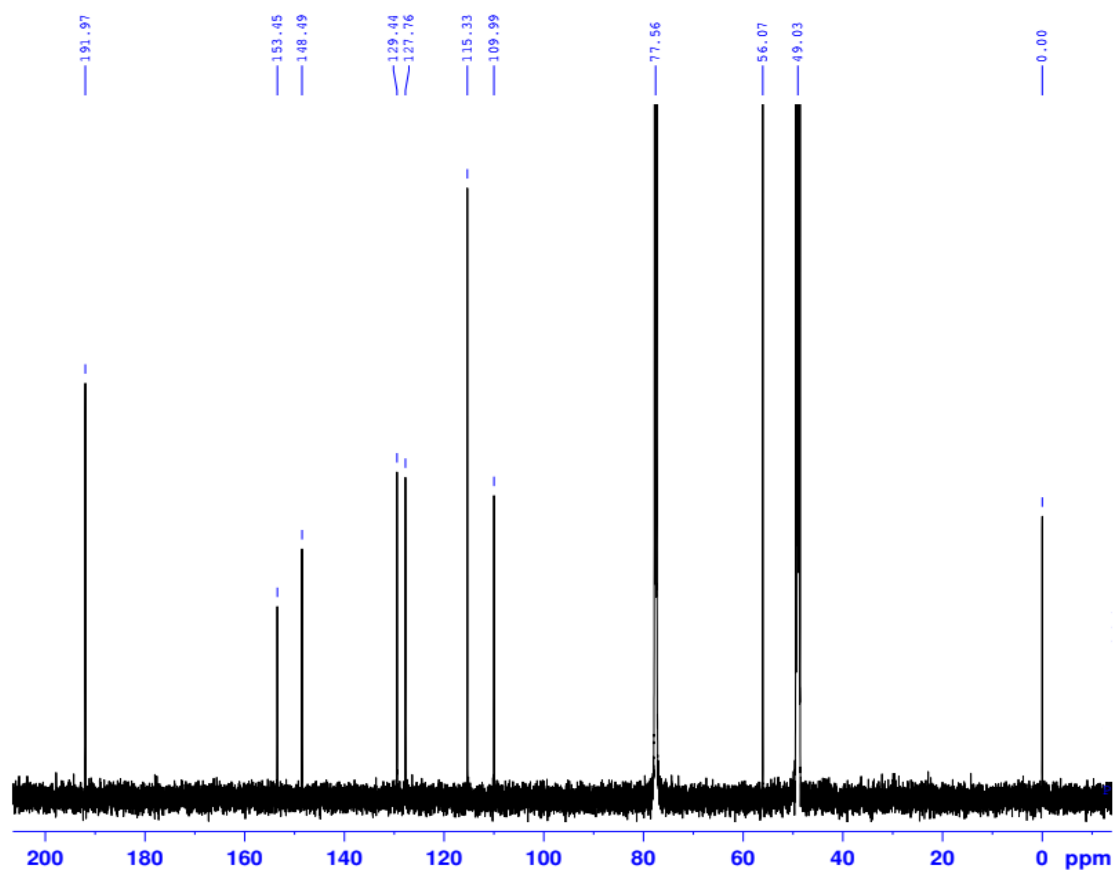

Figure S35.  $^{13}\text{C}$  NMR spectrum (150 MHz,  $\text{CD}_3\text{OD}$  &  $\text{CDCl}_3$ ) of compound 9

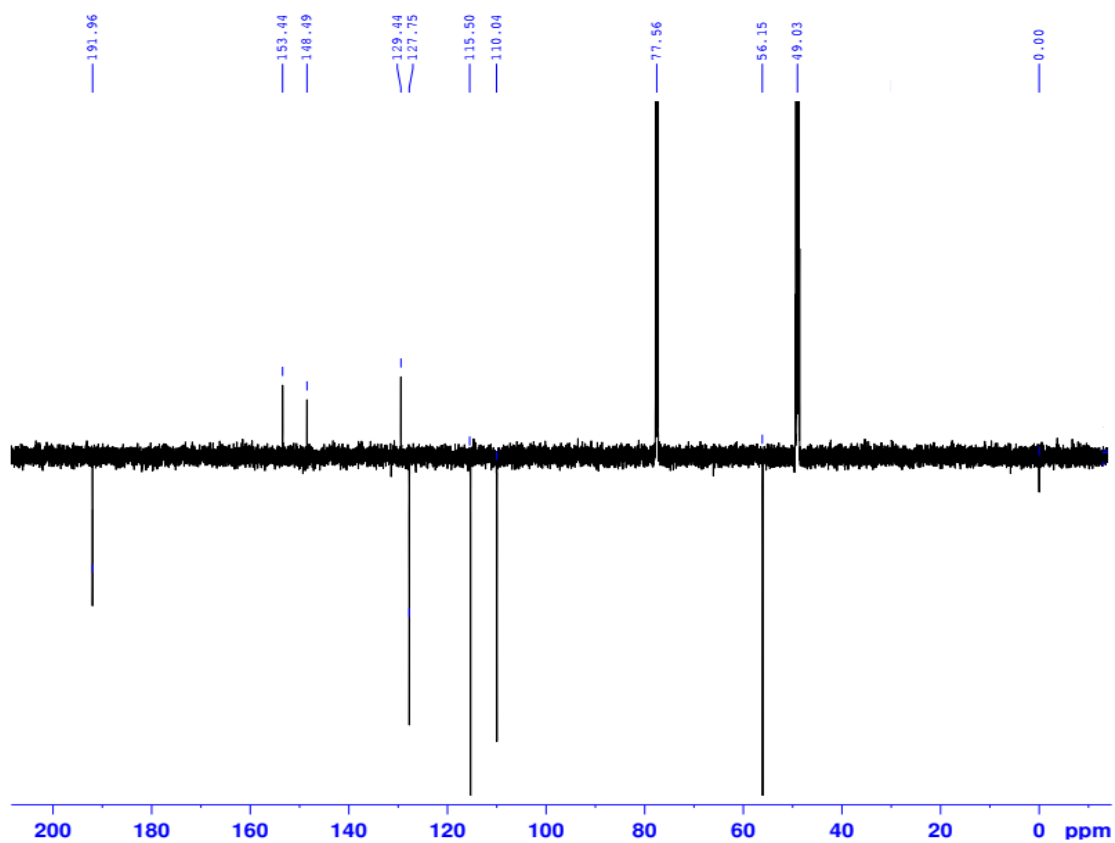

Figure S36. APT spectrum (150 MHz,  $\text{CD}_3\text{OD}$  &  $\text{CDCl}_3$ ) of compound 9

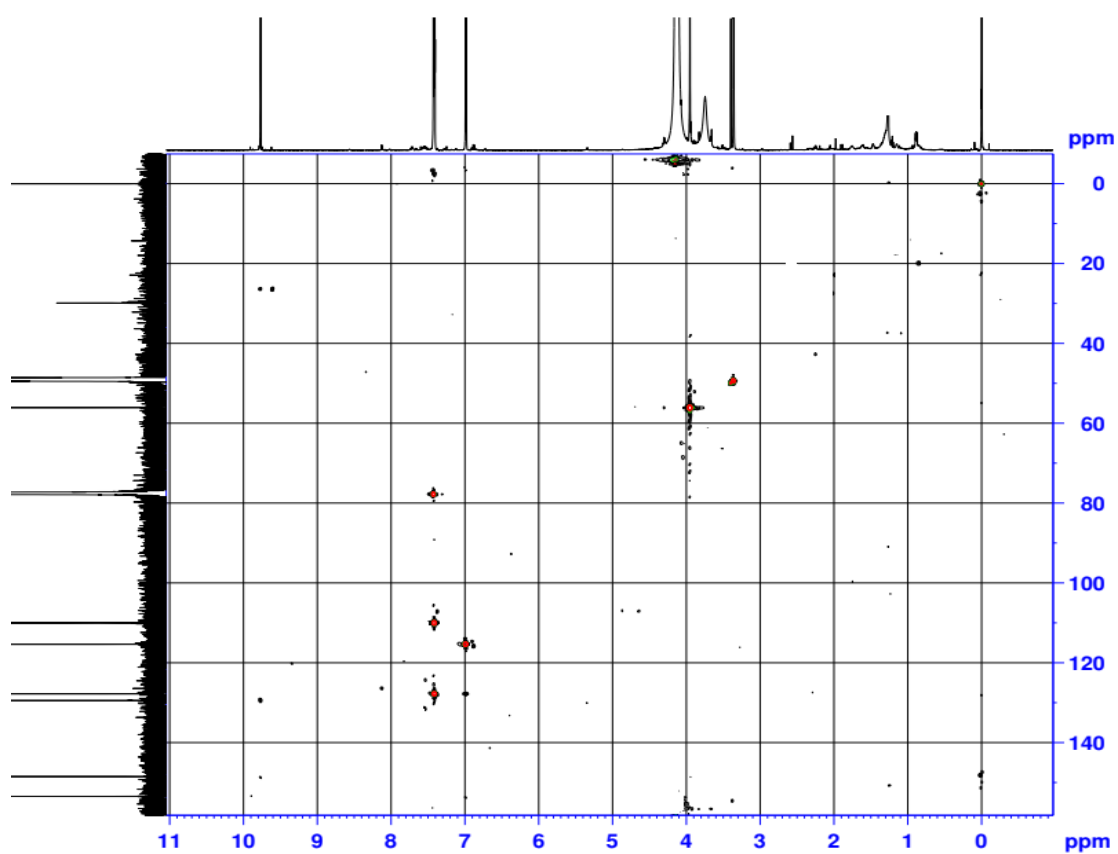

Figure S37. HSQC spectrum ( $\text{CD}_3\text{OD}$  &  $\text{CDCl}_3$ ) of compound 9



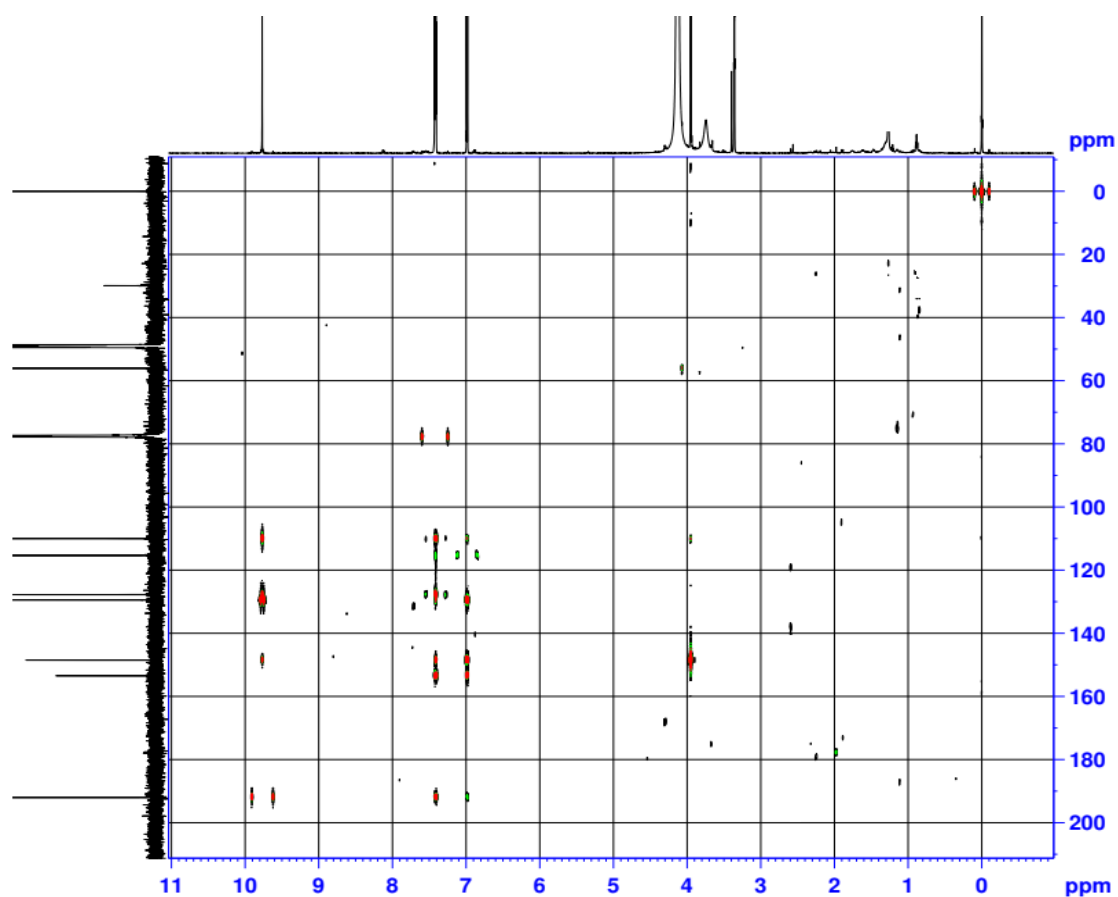

Figure S38. HMBC spectrum ( $\text{CD}_3\text{OD}$  &  $\text{CDCl}_3$ ) of compound 9

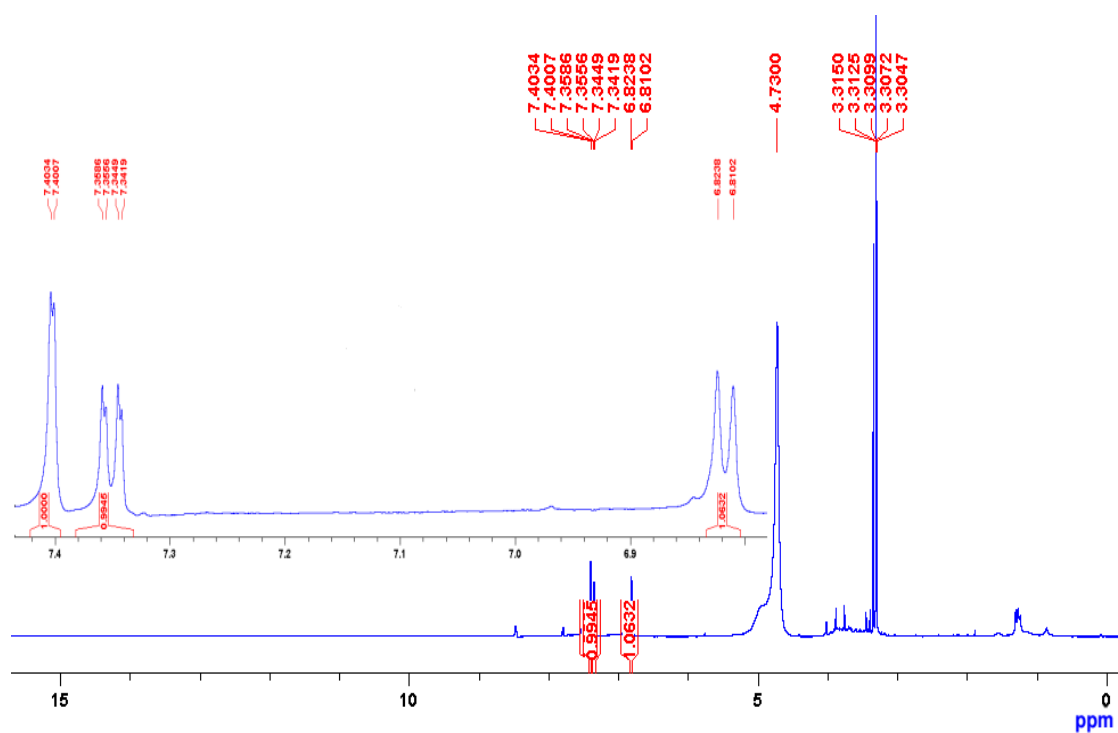

Figure S39.  $^1\text{H}$  NMR spectrum (600 MHz,  $\text{CD}_3\text{OD}$ ) of compound 10

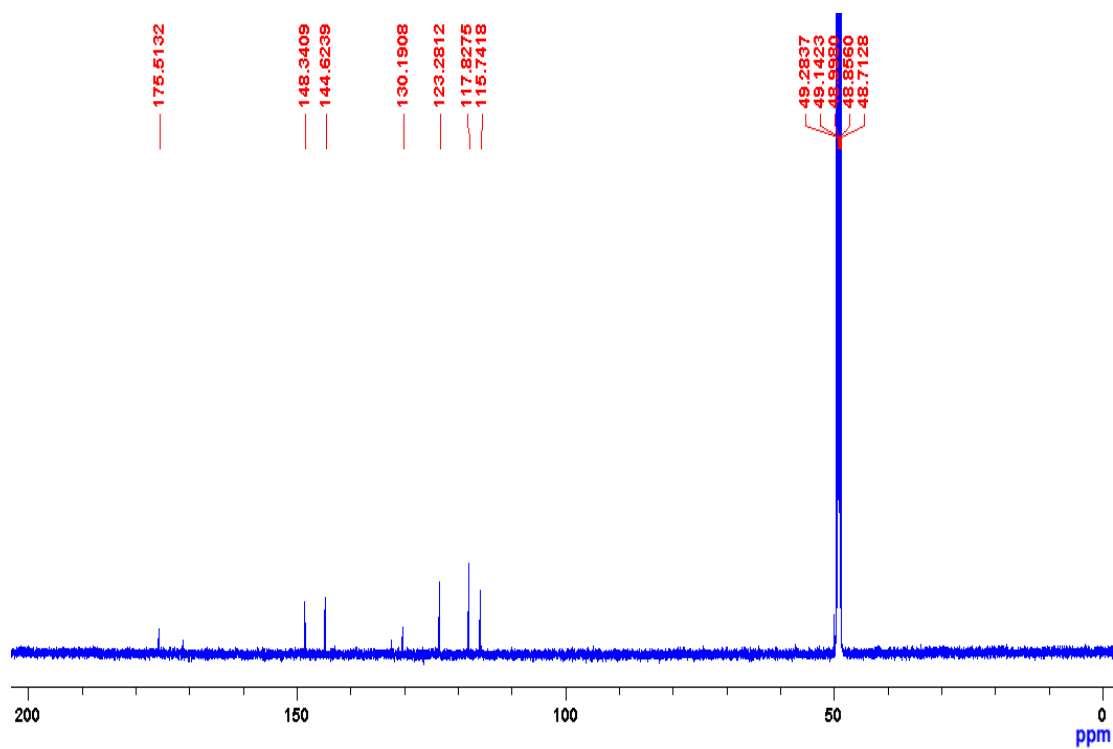

Figure S40.  $^{13}\text{C}$  NMR spectrum (150 MHz,  $\text{CD}_3\text{OD}$ ) of compound 10

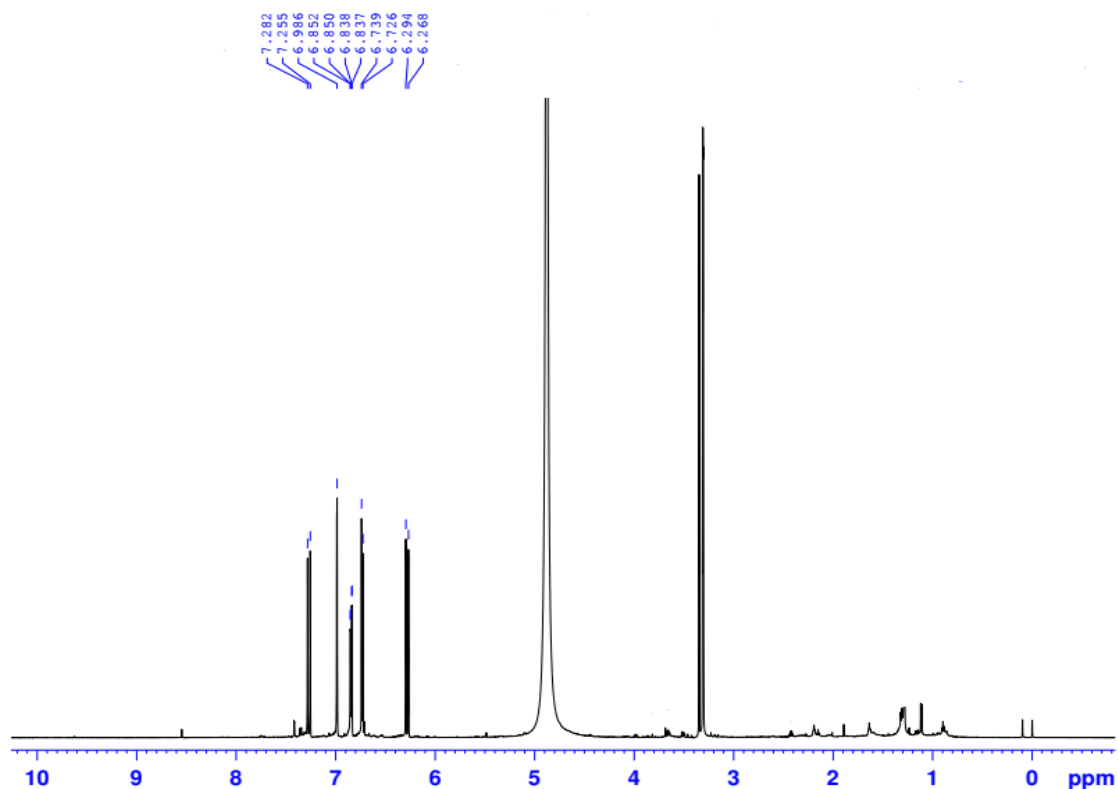

Figure S41.  $^1\text{H}$  NMR spectrum (600 MHz,  $\text{CD}_3\text{OD}$ ) of compound 11

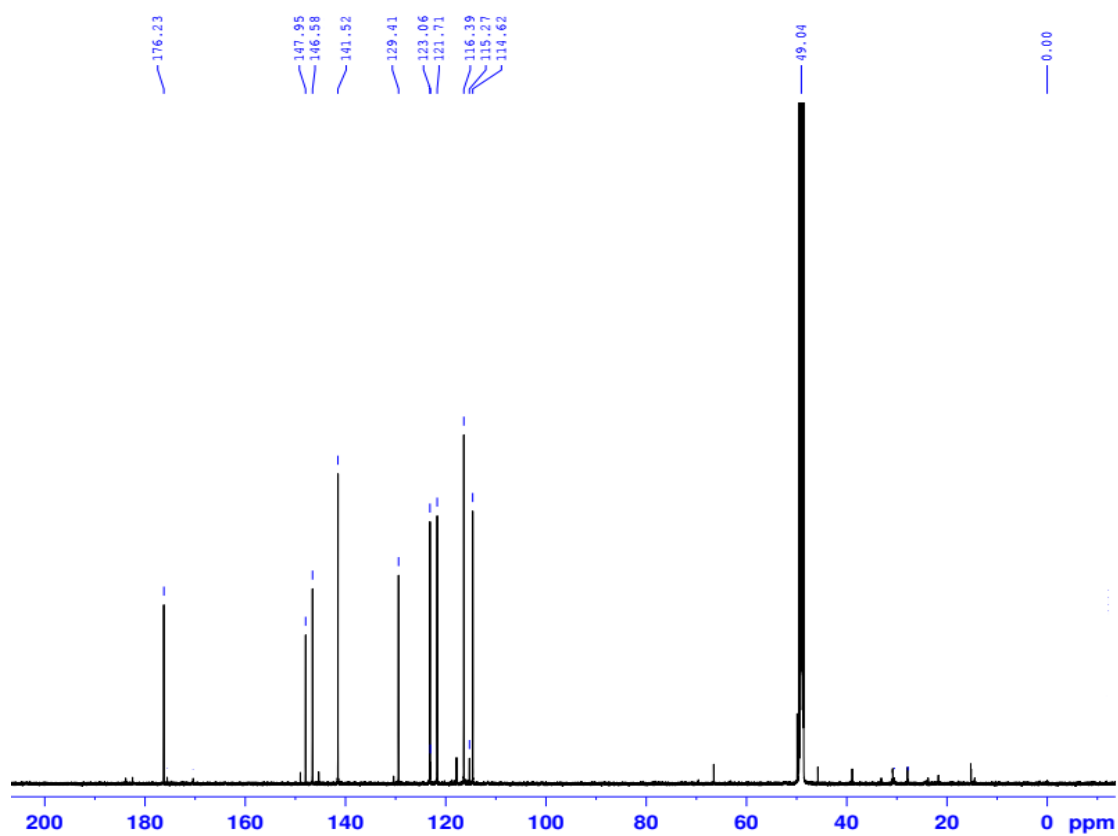

Figure S42. <sup>13</sup>C NMR spectrum (150 MHz, CD<sub>3</sub>OD) of compound 11

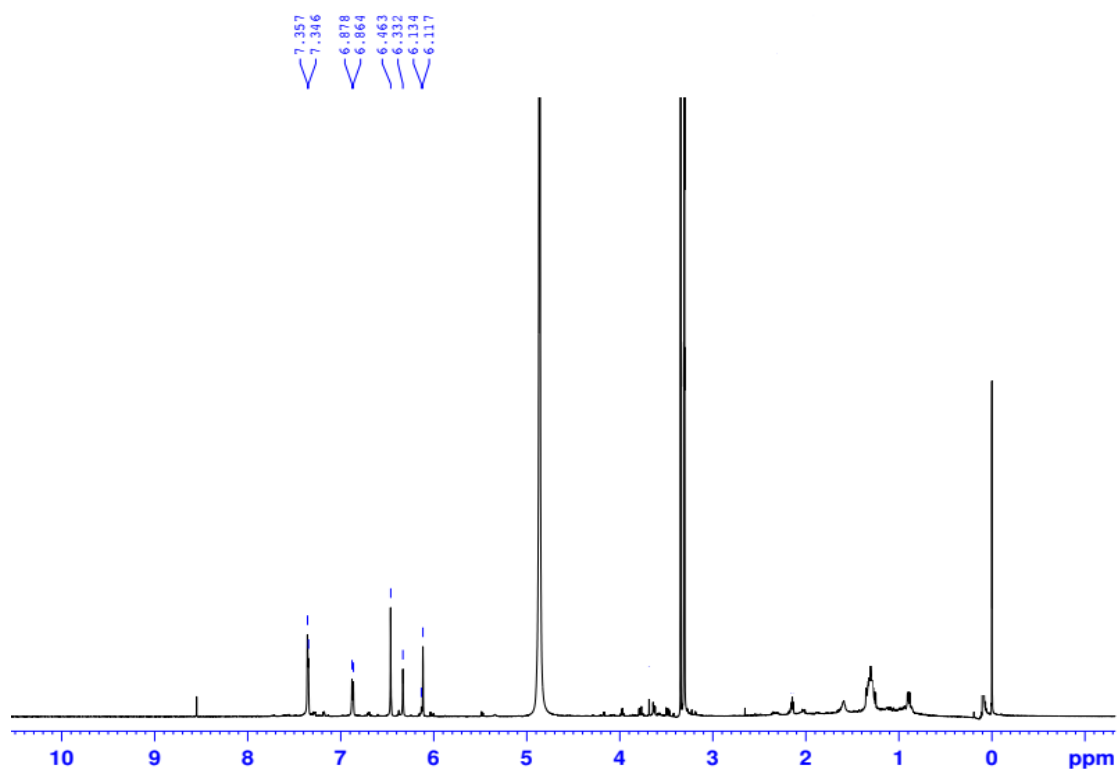

Figure S43. <sup>1</sup>H NMR spectrum (600 MHz, CD<sub>3</sub>OD) of compound 12

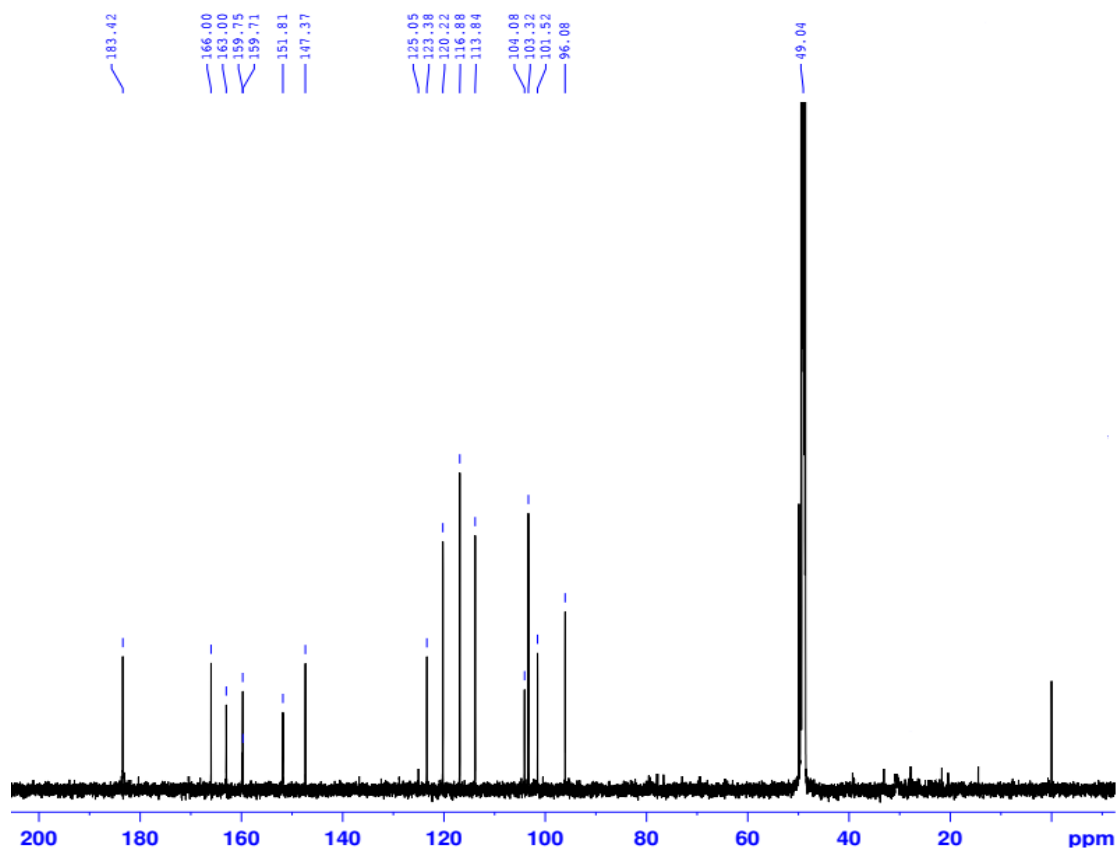

Figure S44.  $^{13}\text{C}$  NMR spectrum (150 MHz,  $\text{CD}_3\text{OD}$ ) of compound 12

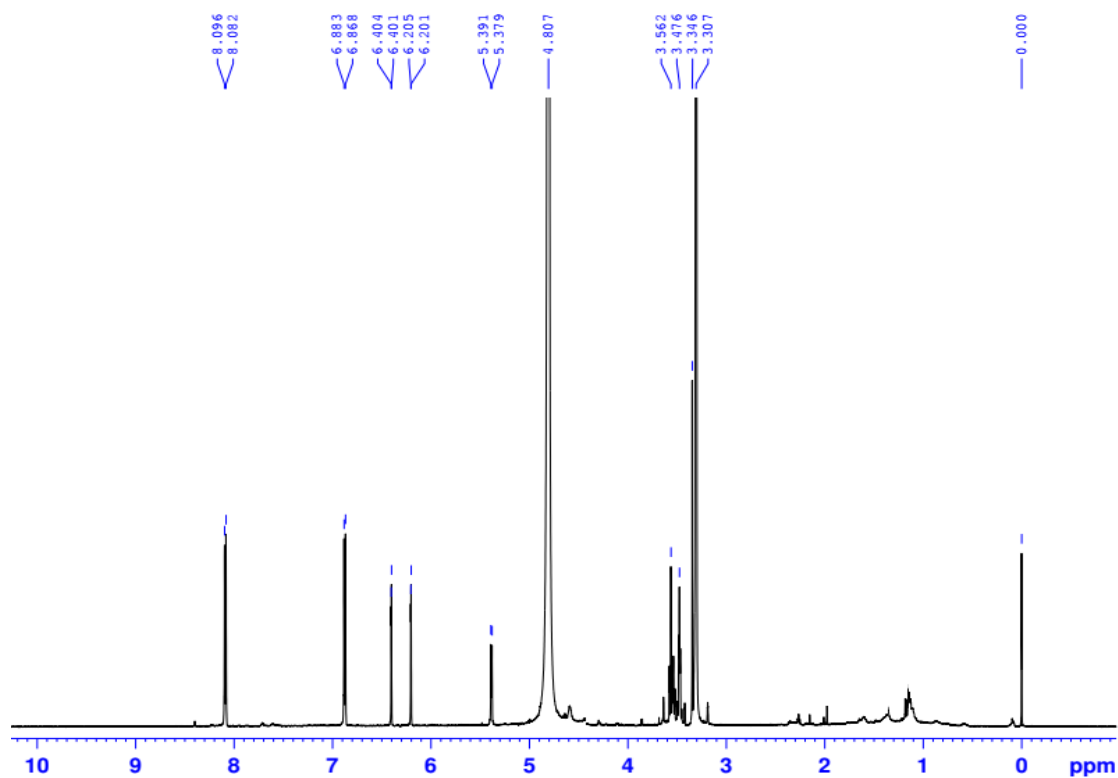

Figure S45.  $^1\text{H}$  NMR spectrum (600 MHz,  $\text{CD}_3\text{OD}$ ) compound 13

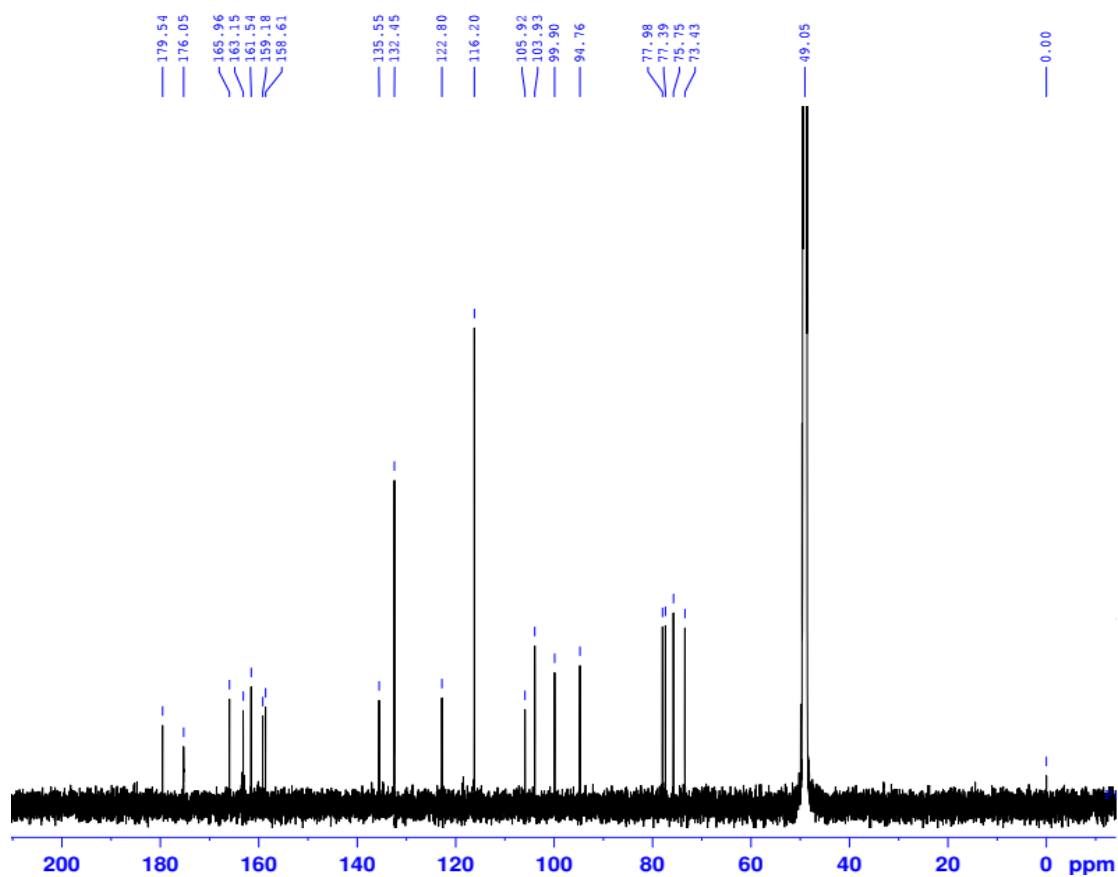

Figure S46.  $^{13}\text{C}$  NMR spectrum (150 MHz,  $\text{CD}_3\text{OD}$ ) of compound 13

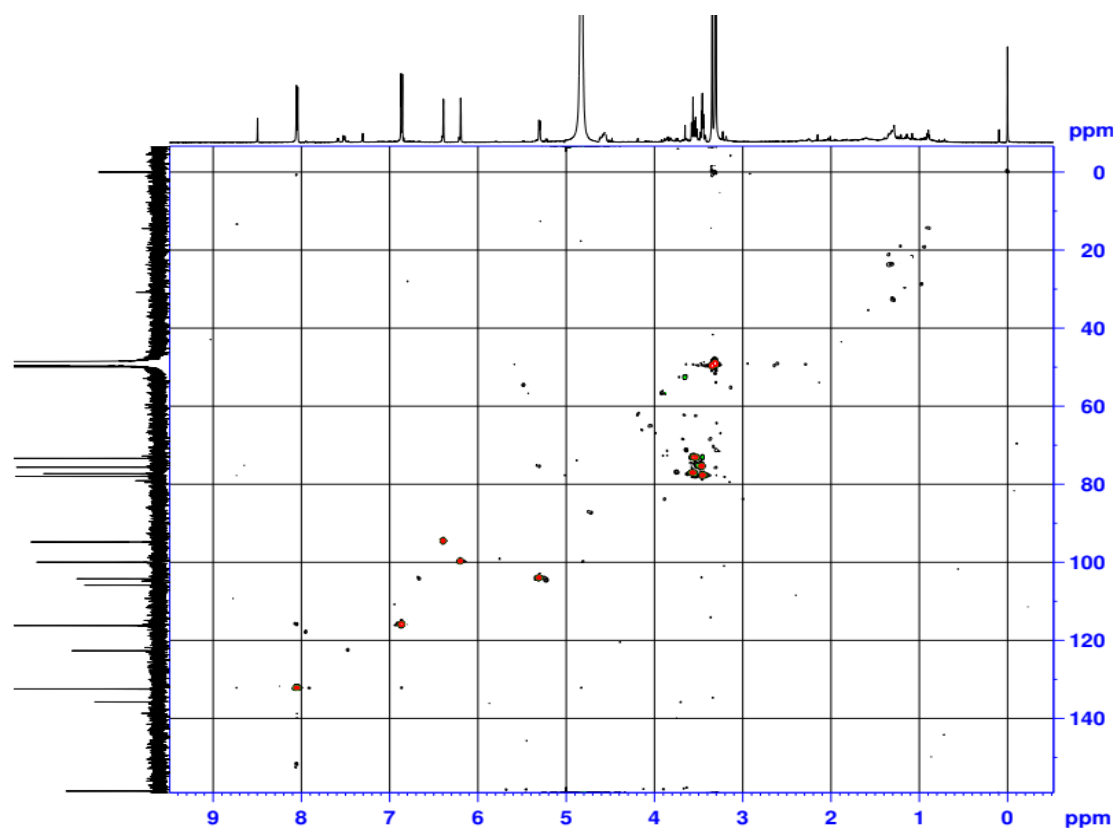

Figure S47. HSQC spectrum ( $\text{CD}_3\text{OD}$ ) of compound 13

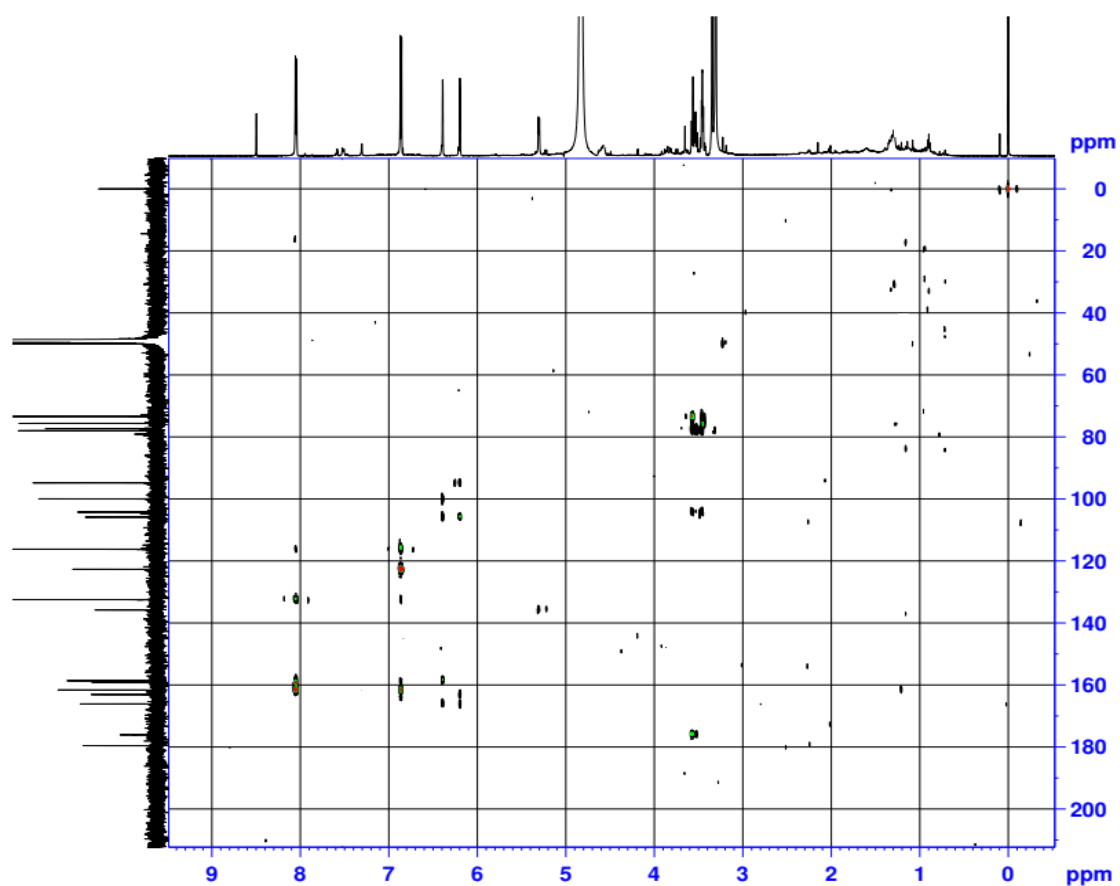

Figure S48. HMBC spectrum ( $\text{CD}_3\text{OD}$ ) of compound 13

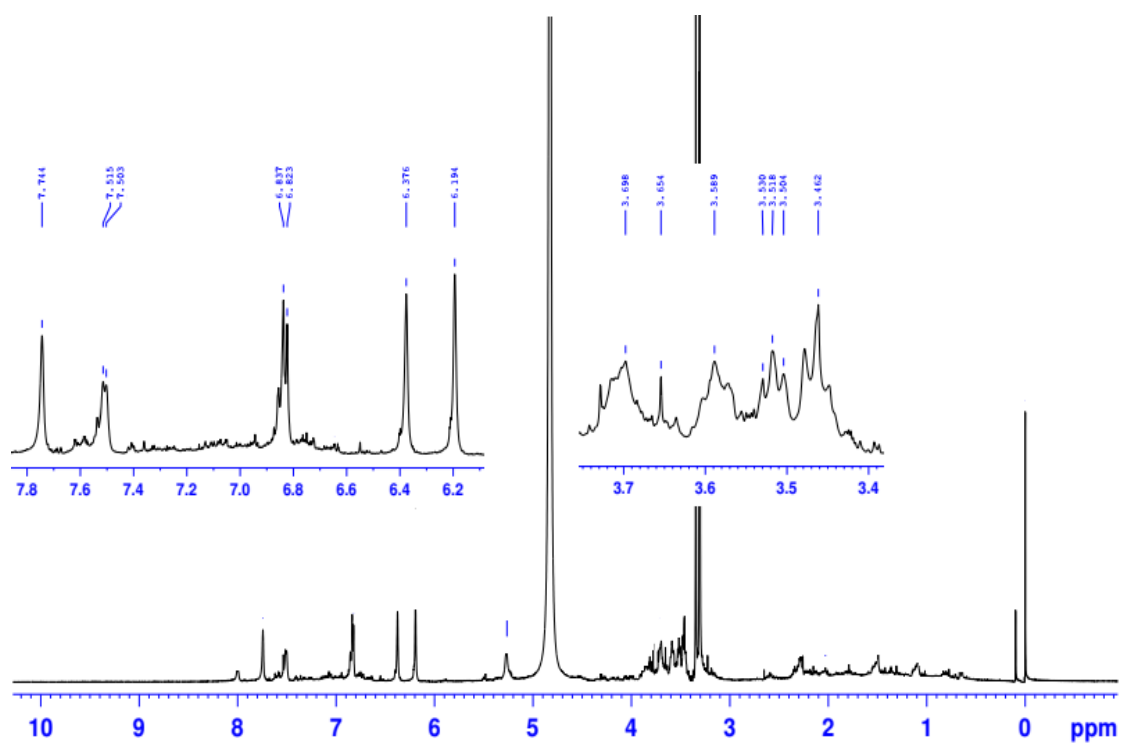

Figure S49.  $^1\text{H}$  NMR spectrum (600 MHz,  $\text{CD}_3\text{OD}$ ) of compound 14

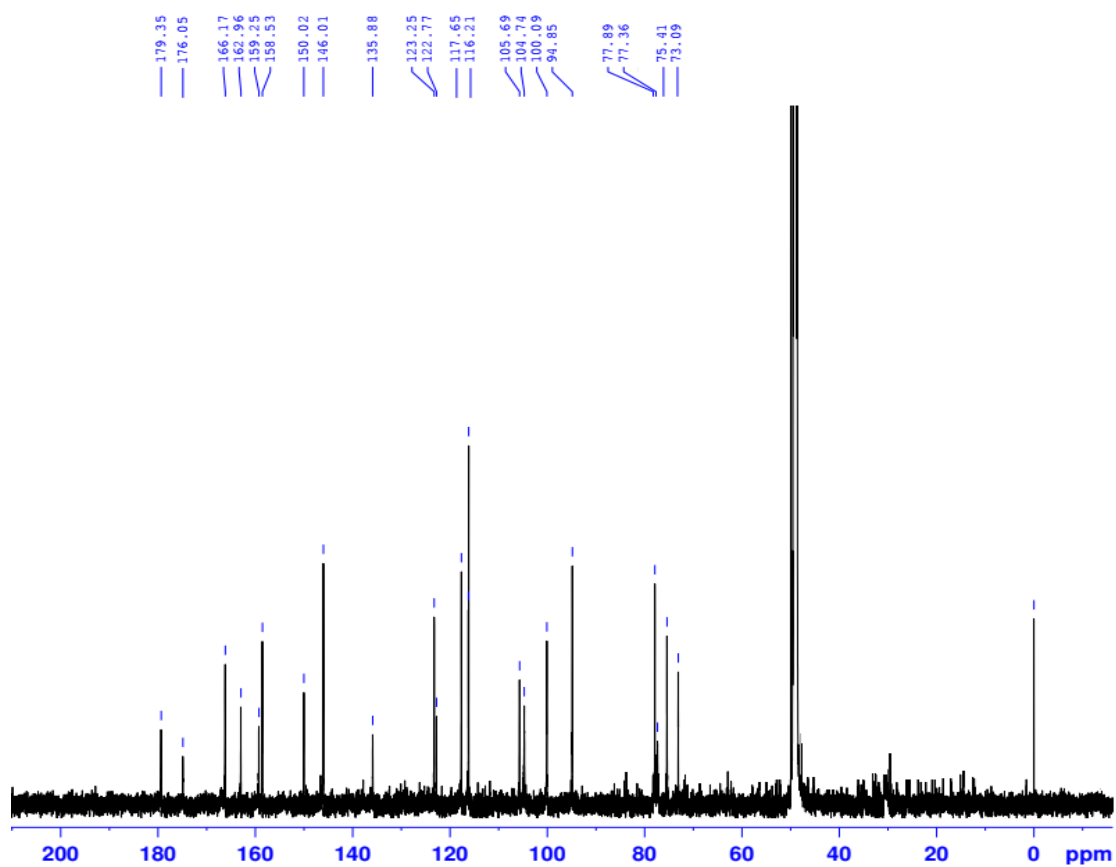

Figure S50.  $^{13}\text{C}$  NMR spectrum (150 MHz,  $\text{CD}_3\text{OD}$ ) of compound 14

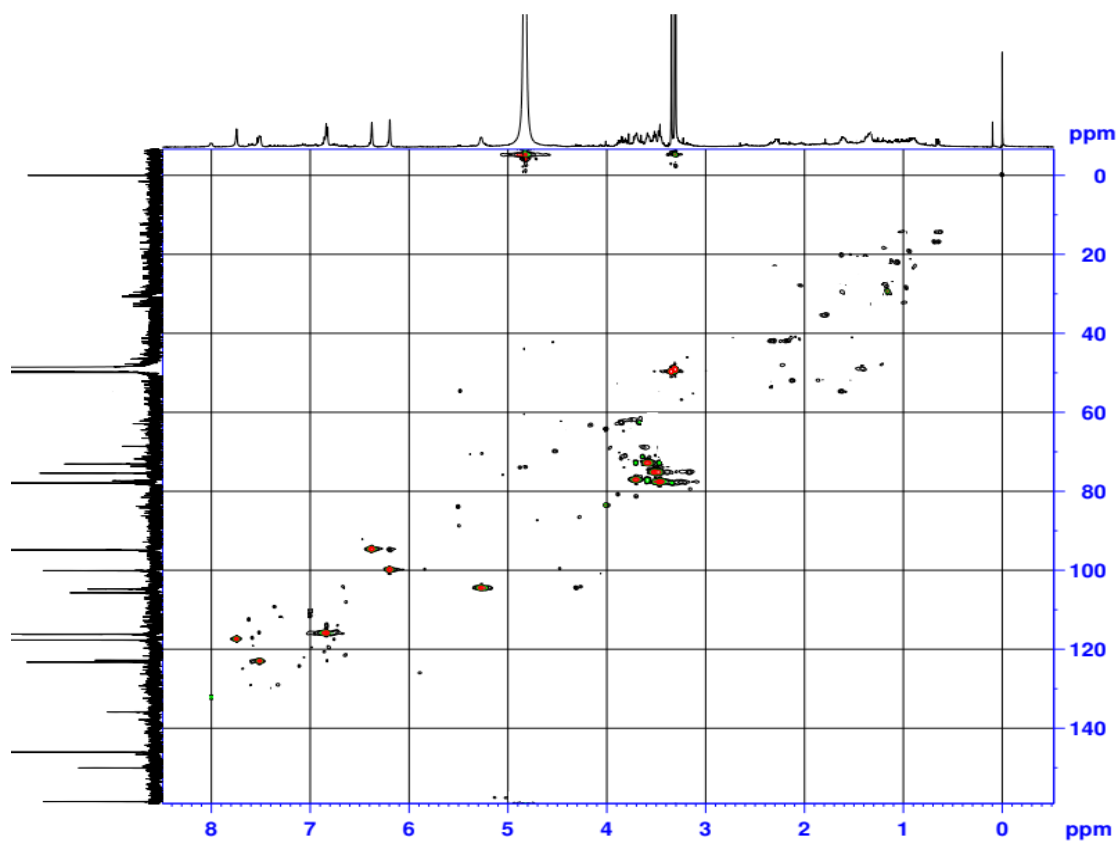

Figure S51. HSQC spectrum ( $\text{CD}_3\text{OD}$ ) of compound 14

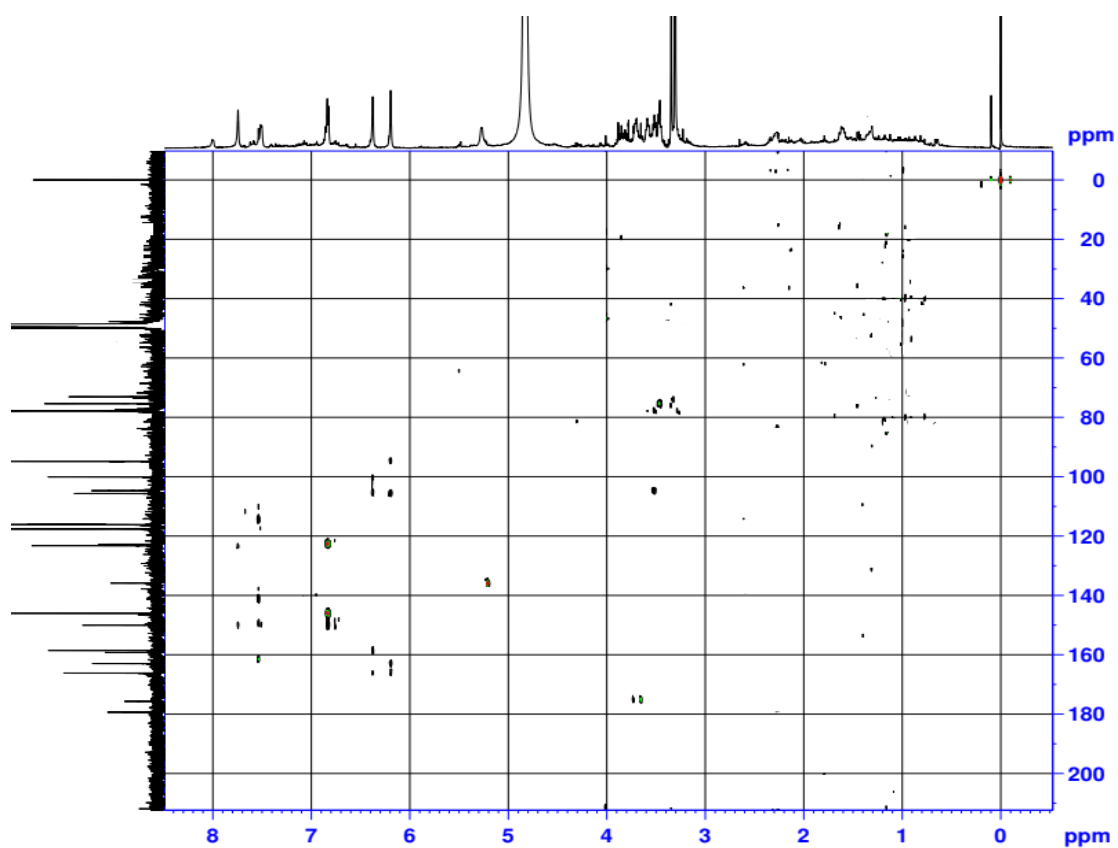

Figure S52. HMBC spectrum ( $\text{CD}_3\text{OD}$ ) of compound 14
